# Supplementary material for: The evidence for improving housing to reduce malaria: a systematic review and meta-analysis
Source: Springer Nature journal article supplement (doi:10.1186/s12936-015-0724-1), 2015-05-18
Supplement: MOESM1 [file 9761322]

**Additional File 1. Search strategy in PubMed (search date December 13, 2013)**

1. Malaria (Medical Subject Headings (MeSH) term)
2. Anopheles (MeSH term)
3. Mosquito Control (MeSH term)
4. Plasmodium (MeSH term)
5. Disease vectors (MeSH term)
6. Insect vectors (MeSH term)
7. Entomology (MeSH term)
8. Malaria (text word)
9. Mosquito\* (text word)
10. Anophel\* (text word)
11. Entomologic\* (text word)
12. Parasitemi\* (text word)
13. Parasitaemi\* (text word)
14. Plasmodium (text word)
15. 1 or 2 or 3 or 4 or 5 or 6 or 7
16. 8 or 9 or 10 or 11 or 12 or 13 or 14
17. 15 or 16
18. Housing (MeSH term)
19. Architecture as topic (MeSH term)
20. Hous\* (text word)
21. Home (text word)
22. Homes (text word)
23. Hut (text word)
24. Huts (text word)
25. Shelter (text word)
26. Shelters (text word)
27. Building\* (text word)
28. Dwelling\* (text word)
29. Eave\* (text word)
30. Wall (text word)
31. Walls (text word)
32. Air brick\* (text word)
33. Airbrick\* (text word)
34. Roof (text word)
35. Roofing (text word)
36. Door (text word)
37. Doors (text word)
38. Window\* (text word)
39. Ceiling\* (text word)
40. Stilt (text word)
41. Stilts (text word)
42. 18 or 19
43. 20 or 21 or 22 or 23 or 24 or 25 or 26 or 27 or 28
44. 29 or 30 or 31 or 32 or 33 or 34 or 35 or 36 or 37 or 38 or 39 or 40 or 41
45. 42 or 43 or 44
46. 17 and 45
