# Supplementary material for: The evidence for improving housing to reduce malaria: a systematic review and meta-analysis
Source: Springer Nature journal article supplement (doi:10.1186/s12936-015-0724-1), 2015-05-18
Supplement: MOESM2 [file 9761322]

Additional File 2. Characteristics of studies

a. Characteristics of intervention studies included in the quantitative analysis (n=6)

| Reference                                             | Kampango 2013 <sup>1</sup>                                                                                                                                                                                                                                      | Kirby 2009 <sup>2</sup>                                                                                                                                                                                                                                                                                                                  | Massebo 2013 <sup>3</sup>                                                                                                                                       | Mng'ong'o 2011 <sup>4</sup>                                                                                          | Njie 2009 <sup>5</sup>                                                                                                                                                                                                                                                       | Ogoma 2010 <sup>6</sup>                                                                                                                                                                                                                                                                   |
|-------------------------------------------------------|-----------------------------------------------------------------------------------------------------------------------------------------------------------------------------------------------------------------------------------------------------------------|------------------------------------------------------------------------------------------------------------------------------------------------------------------------------------------------------------------------------------------------------------------------------------------------------------------------------------------|-----------------------------------------------------------------------------------------------------------------------------------------------------------------|----------------------------------------------------------------------------------------------------------------------|------------------------------------------------------------------------------------------------------------------------------------------------------------------------------------------------------------------------------------------------------------------------------|-------------------------------------------------------------------------------------------------------------------------------------------------------------------------------------------------------------------------------------------------------------------------------------------|
| <b>Trial design</b>                                   | Randomised controlled study (pilot)                                                                                                                                                                                                                             | Randomised controlled study                                                                                                                                                                                                                                                                                                              | Randomised controlled study (pilot)                                                                                                                             | Randomised controlled study (pilot)                                                                                  | Randomised cross-over study (pilot)                                                                                                                                                                                                                                          | Non-randomized cross-over study (pilot)                                                                                                                                                                                                                                                   |
| <b>Age</b>                                            | n/a                                                                                                                                                                                                                                                             | 6 months to 10 years                                                                                                                                                                                                                                                                                                                     | n/a                                                                                                                                                             | n/a                                                                                                                  | n/a                                                                                                                                                                                                                                                                          | n/a                                                                                                                                                                                                                                                                                       |
| <b>Sex</b>                                            | n/a                                                                                                                                                                                                                                                             | Any                                                                                                                                                                                                                                                                                                                                      | n/a                                                                                                                                                             | n/a                                                                                                                  | n/a                                                                                                                                                                                                                                                                          | n/a                                                                                                                                                                                                                                                                                       |
| <b>Sample size for primary and secondary outcomes</b> | <b>Density of adult anophelines:</b> 16 houses                                                                                                                                                                                                                  | <b>Anaemia prevalence in children:</b> 755 children in 500 houses. <b>Density of adult anophelines:</b> 500 houses (100 per year in the full screening arm, 100 per year in the ceiling arm, 50 per year in the control arm)                                                                                                             | <b>Indoor density of adult anophelines:</b> 40 households (20 in the screened arm and 20 in the control arm)                                                    | <b>Density of adult anophelines:</b> 321 houses (231 in treatment arm and 90 in control arm)                         | <b>Density of adult anophelines:</b> 12 houses                                                                                                                                                                                                                               | <b>Density of adult anophelines:</b> 4 local houses (one block) and 4 experimental huts (one block)                                                                                                                                                                                       |
| <b>Intervention</b>                                   | Screening of gables ends and eaves                                                                                                                                                                                                                              | House screening                                                                                                                                                                                                                                                                                                                          | House screening                                                                                                                                                 | House screening with repellent plants                                                                                | Screening of eaves                                                                                                                                                                                                                                                           | House screening                                                                                                                                                                                                                                                                           |
| <b>Details of the intervention</b>                    | Four experimental rounds: one house randomly assigned control and three houses assigned screening of gables with old bednets, untreated shade cloth or deltamethrin-impregnated shade cloth for two weeks; followed by screening gables and eaves for one week. | Houses were randomised to one of three arms: (1) no screening, (2) screened ceilings or (3) full screening (screened doors, windows and closed eaves using a mixture of sand, rubble and cement as is normal local practice).                                                                                                            | Doors and windows were screened with metal mesh and eaves closed with mud.                                                                                      | Screening of house entry points by planting the densely foliated repellent plant <i>Lantana camara</i> around houses | In the first of two four-week intervention periods, 6 of 12 houses (with no windows and screened doors) were randomly selected and eaves blocked. Before the second period, the 6 homes with blocked eaves had them opened, and the 6 homes with open eaves had them closed. | Four repetitions of four experimental treatments over four nights in each block. No screening on the first night; on the subsequent three nights three of the four houses in each block had three identical treatments, changed each night (screening the eaves, windows and then doors). |
| <b>Duration of intervention</b>                       | 3 weeks                                                                                                                                                                                                                                                         | 6 months in each study year                                                                                                                                                                                                                                                                                                              | Two months                                                                                                                                                      | 10 months                                                                                                            | 4 weeks                                                                                                                                                                                                                                                                      | 16 days                                                                                                                                                                                                                                                                                   |
| <b>Co-interventions</b>                               | None                                                                                                                                                                                                                                                            | None. 30% slept under ITNs                                                                                                                                                                                                                                                                                                               | Untreated bednets                                                                                                                                               | None                                                                                                                 | Door screening                                                                                                                                                                                                                                                               | Untreated bednet                                                                                                                                                                                                                                                                          |
| <b>Co-interventions equal?</b>                        | n/a                                                                                                                                                                                                                                                             | n/a                                                                                                                                                                                                                                                                                                                                      | Yes                                                                                                                                                             | n/a                                                                                                                  | Yes                                                                                                                                                                                                                                                                          | Yes                                                                                                                                                                                                                                                                                       |
| <b>Outcomes included in the review</b>                | <b>1. Density of adult anophelines</b> , measured by nightly CDC light trap collections.                                                                                                                                                                        | <b>1. Anaemia prevalence in children: Hb density/house in children</b> , measured by cross-sectional surveys pre- and post-intervention. <b>2. Density of adult mosquitoes</b> , measured by fortnightly CDC light trap collections in all houses. <b>3. Parasite prevalence</b> , measured by RDTs in pre/post cross-sectional surveys. | <b>1. Density of adult anophelines</b> , measured by CDC light trap collections on four consecutive nights every second week in all households over two months. | <b>1. Density of adult anophelines</b> , measured by ≈8 CDC light trap collections across all houses per week.       | <b>1. Density of adult anophelines</b> , sampled using CDC light trap collections one night every two weeks.                                                                                                                                                                 | <b>1. Density of adult anophelines</b> , measured by nightly CDC light trap collections.                                                                                                                                                                                                  |
| <b>Continent</b>                                      | Africa                                                                                                                                                                                                                                                          | Africa                                                                                                                                                                                                                                                                                                                                   | Africa                                                                                                                                                          | Africa                                                                                                               | Africa                                                                                                                                                                                                                                                                       | Africa                                                                                                                                                                                                                                                                                    |
| <b>Country</b>                                        | Mozambique                                                                                                                                                                                                                                                      | The Gambia                                                                                                                                                                                                                                                                                                                               | Ethiopia                                                                                                                                                        | Tanzania                                                                                                             | The Gambia                                                                                                                                                                                                                                                                   | Tanzania                                                                                                                                                                                                                                                                                  |
| <b>Urban or rural</b>                                 | Rural                                                                                                                                                                                                                                                           | Rural                                                                                                                                                                                                                                                                                                                                    | Rural                                                                                                                                                           | Rural                                                                                                                | Rural                                                                                                                                                                                                                                                                        | Rural                                                                                                                                                                                                                                                                                     |
| <b>Primary vectors</b>                                | <i>An. funestus</i> , <i>An. gambiae</i> s.l                                                                                                                                                                                                                    | <i>An. gambiae</i> s.s., <i>Anopheles arabiensis</i>                                                                                                                                                                                                                                                                                     | <i>An. arabiensis</i>                                                                                                                                           | <i>An. gambiae</i> s.l; <i>An. funestus</i> s.s.                                                                     | <i>An. gambiae</i> s.s., <i>Anopheles arabiensis</i>                                                                                                                                                                                                                         | <i>An. gambiae</i> s.l; <i>An. funestus</i> s.s.                                                                                                                                                                                                                                          |
| <b>Transmission</b>                                   | Not reported                                                                                                                                                                                                                                                    | Moderate                                                                                                                                                                                                                                                                                                                                 | Moderate                                                                                                                                                        | High                                                                                                                 | Moderate                                                                                                                                                                                                                                                                     | High                                                                                                                                                                                                                                                                                      |
| <b>Funding</b>                                        | Bill and Melinda Gates Foundation                                                                                                                                                                                                                               | Medical Research Council (UK)                                                                                                                                                                                                                                                                                                            | Centre for International Health, University of Bergen in Norway; Arba Minch University                                                                          | Xerox Foundation                                                                                                     | Medical Research Council (UK)                                                                                                                                                                                                                                                | Valent Bioscience Corporation, CDC, USAID, Addressium Foundation, Wellcome Trust                                                                                                                                                                                                          |

Pilot study: study with less than one year or transmission season of baseline data and/or intervention implemented for less than one year or transmission season; CDC: Centers for Disease Control and Prevention; OR: Odds Ratio; IRR: Incidence Rate Ratio; ITN: Insecticide-treated net.

Tusting LS, Ippolito M, et al. The evidence for improving housing to reduce malaria: a systematic review and meta-analysis.

b. Characteristics of observational studies included in the quantitative analysis (n=66)

| Study                             | Country    | Setting         | Primary vectors                                 | Transmission | LLIN coverage                           | IRS coverage         | Study design                                                 | Study size                                                                           | Age group   | Recruitment of participants                                                                                                       | Control group                                                                                                                                                        | Follow-up | Outcomes included                                                                                                                             |
|-----------------------------------|------------|-----------------|-------------------------------------------------|--------------|-----------------------------------------|----------------------|--------------------------------------------------------------|--------------------------------------------------------------------------------------|-------------|-----------------------------------------------------------------------------------------------------------------------------------|----------------------------------------------------------------------------------------------------------------------------------------------------------------------|-----------|-----------------------------------------------------------------------------------------------------------------------------------------------|
| Abe 2009 VNM <sup>7</sup>         | Vietnam    | Rural           | <i>An. dirus</i>                                | Low          | 50.4% coverage (any net)                | Not reported         | Cross-sectional                                              | 682                                                                                  | All ages    | Community: All inhabitants of one village were surveyed                                                                           | n/a                                                                                                                                                                  | n/a       | Malaria infection (microscopy)                                                                                                                |
| Adiamah 1993 GMB <sup>8</sup>     | The Gambia | Peri-urban      | <i>An. gambiae s.l.</i>                         | Moderate     | 29% coverage (any bednet)               | Not reported         | Case-control                                                 | 253                                                                                  | <10 yrs     | Health facility: Children with mild malaria attending district hospital, age-matched as controls for children with severe malaria | Community controls: healthy, resident >500m from the cases, age-matched                                                                                              | n/a       | Mild malaria (parasitaemia plus fever, microscopy); density of adult Anophelines (geometric mean number adult Anopheles per light trap catch) |
| Al-Mekhlafi 2011 YEM <sup>9</sup> | Yemen      | Rural           | <i>An. arabiensis</i> , <i>An. culicifacies</i> | Low          | Not reported overall                    | Not reported overall | Cross-sectional                                              | 287                                                                                  | All ages    | Health facility: febrile patients presenting                                                                                      | n/a                                                                                                                                                                  | n/a       | Malaria infection (microscopy)                                                                                                                |
| Al-Taïar 2009 YEM <sup>10</sup>   | Yemen      | Rural           | <i>An. arabiensis</i>                           | Low          | 8% coverage in study children (any net) | Not reported overall | Case-control                                                 | 628                                                                                  | 6m – 10 yrs | Health facility: Recruited consecutively from health centres; only one child per family was recruited                             | Community controls: age- and area of residence matched, healthy (no malaria infection or history of malaria in past 6 months), selected randomly from same community | n/a       | Clinical malaria (microscopy)                                                                                                                 |
| Animut 2013 <sup>11</sup>         | Ethiopia   | Rural           | <i>An. arabiensis</i>                           | Not reported | Not reported                            | Not reported         | Cohort                                                       | Pyrethrum spray catch: 10 randomly selected houses on 2 nights per village per month | n/a         | Randomly sampled from 3 villages                                                                                                  | n/a                                                                                                                                                                  | 24 months | Density of <i>An. arabiensis</i> (mean number <i>An. arabiensis</i> per pyrethrum spray catch)                                                |
| Asante 2013 GHA <sup>12</sup>     | Ghana      | Urban and rural | Not stated                                      | High         | 47%                                     | Not reported         | Cohort                                                       | 1855                                                                                 | 0–12 months | Health facilities: infants born to all mothers with and without placental malaria resident in 42 communities                      | n/a                                                                                                                                                                  | 12 months | Clinical malaria (RDT and microscopy); ACD through monthly home visits and PCD at clinics)                                                    |
| Barber 1935 GRC <sup>13</sup>     | Greece     | Rural           | <i>An. elutus</i> , <i>An. maculipennis</i>     | Low          | Not reported                            | Not reported         | Cross-sectional (clinical data); cohort (entomological data) | 461 houses                                                                           | 1–11 months | All children aged 1–11 months resident in five villages (clinical data); all households in five villages (entomological data)     | n/a                                                                                                                                                                  | 18 months | Malaria infection (microscopy); density of adult anophelines (mean number <i>An. elutus</i> and <i>An. maculipennis</i> per resting catch)    |

Tusting LS, Ippolito M, et al. The evidence for improving housing to reduce malaria: a systematic review and meta-analysis.

b. Characteristics of observational studies included in the quantitative analysis (n=66) (continued)

| Study                                       | Country                  | Setting         | Primary vectors                  | Transmission | LLIN coverage                       | IRS coverage | Study design                     | Study size                                                                   | Age group               | Recruitment of participants                                                           | Control group                                                                                                     | Follow-up | Outcomes included                                                                                   |
|---------------------------------------------|--------------------------|-----------------|----------------------------------|--------------|-------------------------------------|--------------|----------------------------------|------------------------------------------------------------------------------|-------------------------|---------------------------------------------------------------------------------------|-------------------------------------------------------------------------------------------------------------------|-----------|-----------------------------------------------------------------------------------------------------|
| <b>Bosman 1992</b> <sup>14</sup>            | Republic of Guinea       | Urban and rural | <i>An. gambiae s.l.</i>          | High         | Not reported                        | Not reported | Cross-sectional                  | 44 pyrethrum spray catches in three villages                                 | n/a                     | Not reported                                                                          | n/a                                                                                                               | n/a       | Density of adult Anophelines (August monthly mean number adult Anopheles per pyrethrum spray catch) |
| <b>Bradley 2013 GNQ</b> <sup>15</sup>       | Bioko, Equatorial Guinea | Rural, coastal  | <i>An. funestus, An. gambiae</i> | High         | 5%                                  | Not reported | Cross-sectional (repeat surveys) | 22726                                                                        | 2–14 years              | Randomly sampled from census survey                                                   | n/a                                                                                                               | n/a       | Malaria infection (RDT)                                                                             |
| <b>Briggs–Watson 1940 USA</b> <sup>16</sup> | USA                      | Rural           | <i>An. quadrimaculatus</i>       | Low          | Not reported                        | Not reported | Cross-sectional                  | 1118 individuals (143 individuals)                                           | All ages                | Purposefully selected from community                                                  | n/a                                                                                                               | n/a       | Malaria infection (microscopy)                                                                      |
| <b>Brooker 2004 KEN</b> <sup>17</sup>       | Kenya                    | Rural, highland | <i>An. gambiae s.l.</i>          | Low          | 3%                                  | Not reported | Case-control                     | 284                                                                          | 7–18 years (school age) | Recruited using active case detection from three schools over 10 weeks                | Age- and school-matched children with absence of symptoms or no parasitaemia                                      | n/a       | Clinical malaria (microscopy)                                                                       |
| <b>Burkot 1989</b> <sup>18</sup>            | Papua New Guinea         | Rural           | <i>An. punctulatus</i>           | High         | 88% reported sleeping under any net | Not reported | Cross-sectional                  | 195 houses                                                                   | n/a                     | Households selected from eight villages (not stated how)                              | n/a                                                                                                               | 12 months | Human biting rate (mean number of Anopheles per human landing catch)                                |
| <b>Butraporn 1986 THA</b> <sup>19</sup>     | Thailand                 | Rural           | <i>Not stated</i>                | High         | 60% report regular use of bednet    | Not reported | Case-control                     | 698                                                                          | All ages                | Systematically sampled from list of malaria-positive cases residing in nine villages  | Community controls (selection not described), matched on age, sex, village of residence                           | n/a       | Malaria infection                                                                                   |
| <b>Charlwood 2003</b> <sup>20</sup>         | Sao Tome                 | Peri-urban      | <i>An. gambiae</i>               | Not reported | Not reported                        | Not reported | Cross-sectional                  | 22 landing catches in homes at ground level; 8 inside houses built on stilts | n/a                     | Not stated                                                                            | n/a                                                                                                               | n/a       | Human biting rate (mean number of Anopheles per man hour of collection (HLC))                       |
| <b>Coleman 2010 ZAF</b> <sup>21</sup>       | South Africa             | Urban           | <i>An. arabiensis</i>            | Low          | 17% report sleeping under any net   | 68%          | Case-control                     | 212 households                                                               | All ages                | Households with at least one confirmed malaria case in study area within study period | Community controls (three nearest households to case households with no confirmed malaria during the same period) | n/a       | At least one confirmed case of clinical malaria in household                                        |

**b. Characteristics of observational studies included in the quantitative analysis (n=66) (continued)**

| Study                               | Country    | Setting         | Primary vectors                                        | Transmission | LLIN coverage                                             | IRS coverage | Study design    | Study size      | Age group  | Recruitment of participants                                                                                                                            | Control group                                                                                                                                                                                | Follow-up    | Outcomes included                                                              |
|-------------------------------------|------------|-----------------|--------------------------------------------------------|--------------|-----------------------------------------------------------|--------------|-----------------|-----------------|------------|--------------------------------------------------------------------------------------------------------------------------------------------------------|----------------------------------------------------------------------------------------------------------------------------------------------------------------------------------------------|--------------|--------------------------------------------------------------------------------|
| Coogle 1927 <sup>22</sup>           | USA        | Rural           | <i>An. quadrimaculatus</i>                             | Low          | Not reported                                              | Not reported | Cohort          | 208 (estimated) | n/a        | Purposefully selected from the community                                                                                                               | n/a                                                                                                                                                                                          | Not reported | Density of adult anophelines (mean number <i>An. quadrimaculatus</i> per home) |
| Dahesh 2009 EGY <sup>23</sup>       | Egypt      | Rural, lowland  | <i>Not stated</i>                                      | Not reported | Not reported                                              | Not reported | Cohort          | 333             | All ages   | All inhabitants of one village                                                                                                                         | n/a                                                                                                                                                                                          | n/a          | Malaria infection                                                              |
| Danis-Lozano 2007 MEX <sup>24</sup> | Mexico     | Rural           | <i>An. pseudopunctipennis</i> ; <i>An. albimanus</i> . | Low          | 54% study participants reported always sleeping under net | Not reported | Case-control    | 357             | All ages   | Recruited from 60 villages by active case detection and by passive case detection at health facilities from community health workers or health clinics | Community controls, age-matched to within 5 years, resident in the study area, with no parasitaemia and no antibodies to <i>P. vivax</i>                                                     | n/a          | Clinical malaria (microscopy)                                                  |
| de Almeida 2010 TLS <sup>25</sup>   | East Timor | Rural           | <i>Not stated</i>                                      | Low          | 49% study participants reported sleeping under a bednet   | Not reported | Cross-sectional | 216             | All ages   | All inhabitants of 71 households (selection not described) were sampled                                                                                | n/a                                                                                                                                                                                          | n/a          | Malaria infection (microscopy)                                                 |
| De Beudrap 2011 UGA <sup>26</sup>   | Uganda     | Urban and rural | <i>Not stated</i>                                      | Moderate     | 45-65% households reported using at least one net         | Not reported | Cross-sectional | 1325            | 0-5 years  | 20 children randomly selected from each of 33 villages                                                                                                 | n/a                                                                                                                                                                                          | n/a          | Malaria infection (microscopy and RDT)                                         |
| Ekpenyong 2008 NGA <sup>27</sup>    | Nigeria    | Rural           | <i>Not stated</i>                                      | High         | 3% reported sleeping under bednet                         | Not reported | Cross-sectional | 1296            | 4-15 years | 36 children randomly selected from six randomly selected schools every month for six months                                                            | n/a                                                                                                                                                                                          | n/a          | Malaria infection (microscopy)                                                 |
| Ernst 2009 KEN <sup>28</sup>        | Kenya      | Rural, highland | <i>An. gambiae s.s.</i>                                | Low          | 4% reported sleeping under bednet                         | Not reported | Case-control    | 1468            | All ages   | Individuals presenting to two health centres with malaria symptoms and positive blood smear                                                            | Community controls: selected from census, matched by area of residence and age category, with no malaria symptoms the previous month and no history of confirmed malaria in the study period | n/a          | Clinical malaria (microscopy)                                                  |

Tusting LS, Ippolito M, et al. The evidence for improving housing to reduce malaria: a systematic review and meta-analysis.

b. Characteristics of observational studies included in the quantitative analysis (n=66) (continued)

| Study                                     | Country       | Setting         | Primary vectors                                                             | Transmission | LLIN coverage                                         | IRS coverage        | Study design    | Study size                                 | Age group  | Recruitment of participants                                                                                       | Control group                                                                                                       | Follow-up | Outcomes included                                                                               |                               |
|-------------------------------------------|---------------|-----------------|-----------------------------------------------------------------------------|--------------|-------------------------------------------------------|---------------------|-----------------|--------------------------------------------|------------|-------------------------------------------------------------------------------------------------------------------|---------------------------------------------------------------------------------------------------------------------|-----------|-------------------------------------------------------------------------------------------------|-------------------------------|
| <b>Gamage-Mendis 1991</b> <sup>29</sup>   | Sri Lanka     | Rural           | <i>An. subpictus</i> , <i>An. culicifacies</i>                              | Moderate     | 7% use of bednets                                     | Not reported        | Cohort          | 279 PSC in 146 houses                      | n/a        | Randomly selected from one village                                                                                | n/a                                                                                                                 | 12 months | Indoor resting density (geometric mean number of <i>Anopheles</i> per trap per night)           |                               |
| <b>Geissbuhler 2007</b> <sup>30</sup>     | Tanzania      | Urban and rural | <i>An. gambiae s.s.</i> , <i>An. arabiensis</i> , <i>An. merus</i>          | Moderate     | 83% reported sleeping under a net                     | Not reported        | Cross-sectional | 216 houses (1 night long HLC in each)      | n/a        | Selected from households enrolled as sentinel sites for UMCP                                                      | n/a                                                                                                                 | 10 weeks  | Human biting rate (mean number of bites received by those sleeping indoors (HLC))               |                               |
| <b>Ghebreyesus 2000 ETH</b> <sup>31</sup> | Ethiopia      | Rural, highland | <i>An. arabiensis</i>                                                       | Low          | Not reported                                          | Not reported        | Cohort          | 2114                                       | 0–10 years | All children aged 0–10 years resident in six villages                                                             | n/a                                                                                                                 | 12 months | Clinical malaria (microscopy)                                                                   |                               |
| <b>Guthman 2001 PER</b> <sup>32</sup>     | Peru          | Rural           | <i>An. albimanus</i> ; <i>An. pseudopunctipennis</i> ; <i>An. calderoni</i> | Low          | 35% reported sleeping under bednet the previous night | 3% in past 6 months | Case-control    | 1292                                       | All ages   | All individuals with malaria symptoms and malaria infection within a community, detected by active case detection | Community controls: age-, sex- and village-matched, with no malaria infection or history of malaria in past 28 days | n/a       |                                                                                                 | Clinical malaria (microscopy) |
| <b>Hagmann 2003 STP</b> <sup>33</sup>     | Principe      | Urban and rural | <i>An. gambiae</i>                                                          | Moderate     | 54% reported using bednets                            |                     | Cross-sectional | 1062                                       | All ages   | All inhabitants of six communities                                                                                | n/a                                                                                                                 | n/a       | Malaria infection (microscopy)                                                                  |                               |
| <b>Haque 2013 BGD</b> <sup>34</sup>       | Bangladesh    | Rural           | <i>An. baimai</i> ; <i>An. minimus s.l.</i> ; <i>An. annularis</i>          | High         | 71% households owned at least 0.5 nets per person     | Not reported        | Cohort          | 1634 (households)                          | Households | All households in all 54 villages in one administrative area                                                      | n/a                                                                                                                 | 24 months | At least one malaria case per household detected by passive case detection at health facilities |                               |
| <b>Hiscox 2013</b> <sup>35</sup>          | Lao PDR       | Rural           | <i>An. philippinensis</i> , <i>An. nivipes</i> , <i>An. aconitus</i>        | Not reported | Not reported                                          | Not reported        | Cross-sectional | 192 households (96 modern; 96 traditional) | n/a        | Randomly selected from census of all households in study area                                                     | n/a                                                                                                                 | n/a       | Human biting rate (mean number of <i>Anopheles</i> per CDC light trap per night)                |                               |
| <b>Hustache 2007 GUF</b> <sup>36</sup>    | French Guiana | Rural, forest   | <i>An. darlingi</i>                                                         | Moderate     | 70% children reported sleeping under bednets          | Not reported        | Cohort          | 369                                        | 0–5 years  | All children aged 0–5 years in one village                                                                        | n/a                                                                                                                 | 12 months | Clinical malaria (microscopy)                                                                   |                               |

Tusting LS, Ippolito M, et al. The evidence for improving housing to reduce malaria: a systematic review and meta-analysis.

b. Characteristics of observational studies included in the quantitative analysis (n=66) (continued)

| Study                                   | Country    | Setting       | Primary vectors                                       | Transmission | LLIN coverage                                 | IRS coverage              | Study design    | Study size                                                                                    | Age group           | Recruitment of participants                                                                                   | Control group                                                                                     | Follow-up | Outcomes included                                                                          |
|-----------------------------------------|------------|---------------|-------------------------------------------------------|--------------|-----------------------------------------------|---------------------------|-----------------|-----------------------------------------------------------------------------------------------|---------------------|---------------------------------------------------------------------------------------------------------------|---------------------------------------------------------------------------------------------------|-----------|--------------------------------------------------------------------------------------------|
| <b>Kaur 2009 MYS</b> <sup>37</sup>      | Malaysia   | Rural, forest | <i>An. maculatus</i>                                  | Moderate     | 95% people reported always sleeping under ITN | 91% in the past yer       | Cross-sectional | 520                                                                                           | All ages            | Residents of 10 villages randomly selected from 19 villages in one district                                   | n/a                                                                                               | n/a       | Malaria infection (microscopy)                                                             |
| <b>Kirby 2008</b> <sup>38</sup>         | The Gambia | Rural         | <i>An. gambiae s.s., An. arabiensis, An. melas</i>    | Moderate     | Not reported                                  | Not reported              | Cross-sectional | 976 houses (with sentinel LTC in 4 additional houses to adjust for nightly density variation) | n/a                 | Randomly selected from 46 residential DSS blocks in town and 22 satellite villages                            | n/a                                                                                               | n/a       | Human biting rate (mean number of <i>Anopheles</i> per CDC light trap per night)           |
| <b>Konradsen 2003 LKA</b> <sup>39</sup> | Sri Lanka  | Rural         | <i>An. culicifacies, An. subpictus</i>                | Not reported | Very low'                                     | Aprox 82% 'good' coverage | Cohort          | 2640 collections in 473 houses (indoor resting densities sampled fortnightly)                 | n/a                 | New 10% sample of houses from 7 contiguous villages randomly selected every fortnight                         | n/a                                                                                               | 30 months | Presence (vs absence) of <i>An. subpictus</i> in each collection (pyrethrum spray catch)   |
| <b>Koram 1995 GMB</b> <sup>40</sup>     | The Gambia | Peri-urban    | <i>An. gambiae s.s.</i>                               | Moderate     | 32% reported using bednets                    | Not reported              | Case-control    | 768                                                                                           | 3m to 10 years      | Children presenting to clinic with mild malaria                                                               | Community controls: age-matched, randomly selected from compound at least 400m from case compound | n/a       | Clinical malaria (microscopy)                                                              |
| <b>Kreuels 2008 GHA</b> <sup>41</sup>   | Ghana      | Rural         | <i>An. gambiae s.s., An. arabiensis, An. funestus</i> | High         | 31% reported using bednet                     | Not reported              | Cohort          | 535                                                                                           | 3 months to 2 years | Participants enrolled into a randomized, double-blind, placebo-controlled study of IPTi                       | n/a                                                                                               | 21 months | Clinical malaria (microscopy)                                                              |
| <b>Lindsay 1988</b> <sup>42</sup>       | The Gambia | Rural         | <i>An. gambiae s.s., An. arabiensis</i>               | Not reported | Not reported                                  | Not reported              | Cohort          | Not reported                                                                                  | n/a                 | Selected from 4 hamlets                                                                                       | n/a                                                                                               | 6 months  | Density of adult Anophelines (mean number of <i>Anopheles</i> per night)                   |
| <b>Lindsay 1995</b> <sup>43</sup>       | The Gambia | Rural         | <i>An. gambiae s.s., An. arabiensis</i>               | High         | 90% (children, any net)                       | Not reported              | Cohort          | 381 bednets in use in one village                                                             | n/a                 | 140 bednets sampled randomly every three weeks from bednets of all 381 children aged 0-7 years in one village | n/a                                                                                               | 18 months | Density of of adult anophelines (mean number <i>An. gambiae s.l.</i> caught under bednets) |

**b. Characteristics of observational studies included in the quantitative analysis (n=66) (continued)**

| Study                               | Country  | Setting       | Primary vectors                                                       | Transmission       | LLIN coverage                                 | IRS coverage | Study design    | Study size                                   | Age group           | Recruitment of participants                                                                   | Control group | Follow-up | Outcomes included                                                                                                     |
|-------------------------------------|----------|---------------|-----------------------------------------------------------------------|--------------------|-----------------------------------------------|--------------|-----------------|----------------------------------------------|---------------------|-----------------------------------------------------------------------------------------------|---------------|-----------|-----------------------------------------------------------------------------------------------------------------------|
| Liu 2014 TZA <sup>44</sup>          | Tanzania | Rural         | <i>An. gambiae s.l.</i> ; <i>An. arabiensis</i>                       | Moderate           | 57% household ownership                       | Not reported | Cohort          | 435 houses                                   | 2 months – 2 years  | Randomly selected from participants of IPTi trial                                             | n/a           | 22 months | Clinical malaria (microscopy); density of adult anophelines (mean number of <i>Anopheles</i> collected per household) |
| Magalhaes 2012 AGO <sup>45</sup>    | Angola   | Rural         | Not stated                                                            | Moderate           | 28% mothers owned bednets                     | Not reported | Cross-sectional | 2265                                         | ≤15 years           | Households randomly selected from DSS administrative area                                     | n/a           | n/a       | Malaria infection (RDT)                                                                                               |
| Maheu-Giroux 2010 PER <sup>46</sup> | Peru     | Rural, forest | <i>An. darlingi</i>                                                   | Low                | Not reported                                  | Not reported | Cohort          | 1018                                         | All ages            | All households within catchment of health facility sampled, 90% consented to provide data     | n/a           | 30 months | Incidence of clinical malaria (microscopy, retrospective passive case detection)                                      |
| Malik 2003 SDN <sup>47</sup>        | Sudan    | Urban         | <i>An. arabiensis</i>                                                 | Moderate           | 11% households used bednets                   | Not reported | Cross-sectional | 8092                                         | All ages            | Households randomly selected from three administrative areas and surveyed in three surveys    | n/a           | n/a       | Malaria infection (microscopy)                                                                                        |
| Mmbando 2011 TZA <sup>48</sup>      | Tanzania | Rural         | Not stated                                                            | High               | 'High'                                        | Not reported | Cross-sectional | 12298                                        | 0–19 years          | Randomly selected from 14 villages                                                            | n/a           | n/a       | Malaria infection (microscopy)                                                                                        |
| Mutuku 2011 <sup>49</sup>           | Kenya    | Rural         | <i>An. funestus</i> , <i>An. gambiae s.s.</i> , <i>An. arabiensis</i> | Moderate           | 68% coverage of all sleeping places (any net) | Not reported | Cohort          | 1777 collections in 20 houses sampled weekly | n/a                 | Randomly selected from two villages                                                           | n/a           | 89 weeks  | Density of adult Anophelines (pyrethrum spray catch)                                                                  |
| Nahum 2010 BEN <sup>50</sup>        | Benin    | Peri-urban    | <i>An. gambiae s.s.</i> ; <i>An. melas</i>                            | Moderate, seasonal | 55% children slept under a bednet             | Not reported | Cohort          | 553                                          | 6 months to 5 years | All eligible children from households enumerated in census survey                             | n/a           | 18 months | Clinical malaria (microscopy)                                                                                         |
| Oosterholt 2006 TZA <sup>51</sup>   | Tanzania | Rural         | <i>An. arabiensis</i>                                                 | Low                | Not reported                                  | Not reported | Cohort          | 3388                                         | All ages            | All inhabitants of one village included; cases identified by passive case detection at clinic | n/a           | 12 months | Clinical malaria (fever plus parasitaemia, microscopy)                                                                |

Tusting LS, Ippolito M, et al. The evidence for improving housing to reduce malaria: a systematic review and meta-analysis.

b. Characteristics of observational studies included in the quantitative analysis (n=66) (continued)

| Study                             | Country                  | Setting              | Primary vectors                                                       | Transmission | LLIN coverage                                                                         | IRS coverage                 | Study design    | Study size                              | Age group   | Recruitment of participants                                                                      | Control group                                                                                                                                                                           | Follow-up | Outcomes included                                         |
|-----------------------------------|--------------------------|----------------------|-----------------------------------------------------------------------|--------------|---------------------------------------------------------------------------------------|------------------------------|-----------------|-----------------------------------------|-------------|--------------------------------------------------------------------------------------------------|-----------------------------------------------------------------------------------------------------------------------------------------------------------------------------------------|-----------|-----------------------------------------------------------|
| Ong'Echa 2006 KEN <sup>52</sup>   | Kenya                    | Rural                | <i>An. gambiae s.s.</i> ; <i>An. arabiensis</i> ; <i>An. funestus</i> | High         | 35% households reported using bednets                                                 | Not reported                 | Case-control    | 374                                     | 0-3 years   | Children attending district hospital with malaria symptoms and positive smear                    | Hospital controls: recruited from MCH clinic at the same hospital during presentation for EPI vaccinations, malaria-negative smear and no history of fever or diarrhoea in past 14 days | n/a       | Malaria anaemia, malaria infection                        |
| Osterbauer 2012 UGA <sup>53</sup> | Uganda                   | Rural                | Not stated                                                            | High         | 34% study participants reported sleeping under ITN the previous night                 | None                         | Cross-sectional | 600                                     | 4-6 months  | Recruited using convenience sampling at antenatal clinic in district hospital                    | n/a                                                                                                                                                                                     | n/a       | Malaria infection (microscopy)                            |
| Ouma 2007 KEN <sup>54</sup>       | Kenya                    | Urban and peri-urban | Not stated                                                            | High         | 32% women used ITN in pregnancy                                                       | Not reported                 | Cross-sectional | 685                                     | 15-45 years | First ANC attenders at district hospital screened for folic acid supplementation trial           | n/a                                                                                                                                                                                     | n/a       | Malaria infection (microscopy)                            |
| Pardo 2006 GNQ <sup>55</sup>      | Bioko, Equatorial Guinea | Urban and rural      | <i>An. gambiae s.s.</i> ; <i>An. funestus</i>                         | High         | 38% slept under any net                                                               | 78%                          | Cross-sectional | 433                                     | 0-5 years   | Randomly selected from the community                                                             | n/a                                                                                                                                                                                     | n/a       | Malaria infection (microscopy)                            |
| Peterson 2009a ETH <sup>56</sup>  | Ethiopia                 | Peri-urban           | <i>An. arabiensis</i>                                                 | Low          | 3% households owned a ITN at baseline                                                 | Not reported                 | Cohort          | 294 (households; with 1367 individuals) | >1 year     | Random sampling of every fourth house in city administrative unit                                | n/a                                                                                                                                                                                     | 4 months  | Clinical malaria (microscopy)                             |
| Peterson 2009b ETH <sup>57</sup>  | Ethiopia                 | Peri-urban           | <i>An. arabiensis</i>                                                 | Low          | 4% compounds owned an ITN                                                             | Not reported                 | Cohort          | 1187 (compounds; with 8008 individuals) | >1 year     | All compounds within one city administrative unit                                                | n/a                                                                                                                                                                                     | 4 months  | Clinical malaria (microscopy)                             |
| Rulisa 2013 RWA <sup>58</sup>     | Rwanda                   | Rural                | Not stated                                                            | Moderate     | 97% people reported sleeping under bednet                                             | 94% (self reported coverage) | Cross-sectional | 520 (households; with 2634 individuals) | All ages    | Households in which one member presented at study health facility with fever or history of fever | n/a                                                                                                                                                                                     | n/a       | At least one malaria infection in household (microscopy)  |
| Russell 2013 <sup>59</sup>        | Tanzania                 | Rural                | <i>An. arabiensis</i> , <i>An. gambiae s.s.</i>                       | High         | Number of bednets in use per person ranged from 0.44 to 0.63 in high density clusters | Not reported                 | Cohort          | 72 houses sampled monthly               | n/a         | Randomly selected from two villages                                                              | n/a                                                                                                                                                                                     | 12 months | Density of adult <i>An. gambiae</i> s.l. (CDC light trap) |



Tusting LS, Ippolito M, et al. The evidence for improving housing to reduce malaria: a systematic review and meta-analysis.

b. Characteristics of observational studies included in the quantitative analysis (n=66) (continued)

| Study                                                                                                    | Country    | Setting                     | Primary vectors                                                       | Transmission     | LLIN coverage                                                        | IRS coverage                         | Study design    | Study size      | Age group           | Recruitment of participants                                                                                                | Control group                                                                                                                 | Follow-up | Outcomes included                                                                                                                          |
|----------------------------------------------------------------------------------------------------------|------------|-----------------------------|-----------------------------------------------------------------------|------------------|----------------------------------------------------------------------|--------------------------------------|-----------------|-----------------|---------------------|----------------------------------------------------------------------------------------------------------------------------|-------------------------------------------------------------------------------------------------------------------------------|-----------|--------------------------------------------------------------------------------------------------------------------------------------------|
| Sintasath 2005 ERI <sup>60</sup>                                                                         | Eritrea    | Rural; highland and lowland | <i>An. arabiensis</i>                                                 | Low              | Not reported                                                         | 39% villages were covered            | Cross-sectional | 2779 households | All ages            | Randomly selected from villages in six zobas that were selected due to greater ecological diversity and population density | n/a                                                                                                                           | n/a       | At least one malaria infection in household (RDT)                                                                                          |
| Siri 2010 KEN <sup>61</sup>                                                                              | Kenya      | Urban to semi-rural         | <i>Not stated</i>                                                     | High             | 46% children slept under bednet the previous week                    | Not reported                         | Case-control    | 906             | 0-7 years           | Children admitted to district hospital inpatient ward with malaria anaemia and high parasitaemia                           | Community controls: Healthy respondents to a concurrent citywide knowledge, attitude, and practice survey; aged 0-7 years     | n/a       | Malaria anaemia (microscopy)                                                                                                               |
| Temu 2012 MOZ <sup>63</sup>                                                                              | Mozambique | Rural                       | <i>An. gambiae</i> , <i>An. funestus</i>                              | High             | 23% children slept under ITN                                         | 65% children lived in homes with IRS | Cross-sectional | 8338            | 1-15 years          | Surveyed as part of a Malaria Indicator Survey at 19 sentinel sites                                                        | n/a                                                                                                                           | n/a       | Malaria infection (RDT)                                                                                                                    |
| Townes 2013 MWI <sup>64</sup>                                                                            | Malawi     | Rural                       | <i>An. funestus</i> , <i>An. gambiae s.s.</i> , <i>An. arabiensis</i> | High             | 53% households at least one bednet                                   | Not reported                         | Cross-sectional | 390             | 4 months to 5 years | All children aged 4 months to 5 years resident in 10 randomly selected villages                                            | n/a                                                                                                                           | n/a       | Malaria infection (RDT)                                                                                                                    |
| Van der Hoek 2003 LKA <sup>65</sup>                                                                      | Sri Lanka  | Rural                       | <i>An. culicifacies</i>                                               | Low              | 6% participants reported sleeping under a bednet in the past 2 weeks | None                                 | Case-control    | 875             | All ages            | Inhabitants of seven villages who attended district hospital or mobile clinic with positive blood smear                    | Community controls: randomly selected from census of same villages who did not report a malaria episode in previous two weeks | n/a       | Malaria infection (microscopy)                                                                                                             |
| Wanzirah 2015 <sup>66</sup> (included as unpublished data at the time of the search and since published) | Uganda     | Rural                       | <i>An. gambiae s.s.</i> , <i>An. arabiensis</i>                       | Moderate to high | 99% reported sleeping under any net the previous night               | None                                 | Cohort          | 300 households  | n/a                 | 100 households randomly selected from census population in each of three sites                                             | n/a                                                                                                                           | 24 months | Clinical malaria (microscopy); malaria infection (microscopy); human biting rate (mean number of <i>Anopheles</i> per household per night) |
| Winskill 2011 TZA <sup>67</sup>                                                                          | Tanzania   | Rural                       | <i>An. gambiae s.l.</i>                                               | High             | 46% slept under ITN                                                  | Not reported                         | Cross-sectional | 1438            | 6 months - 13 years | All eligible residents of five villages                                                                                    | n/a                                                                                                                           | n/a       | Malaria infection (microscopy)                                                                                                             |

Tusting LS, Ippolito M, et al. The evidence for improving housing to reduce malaria: a systematic review and meta-analysis.

b. Characteristics of observational studies included in the quantitative analysis (n=66) (continued)

| Study                           | Country      | Setting           | Primary vectors                              | Transmission | LLIN coverage                                                                              | IRS coverage  | Study design    | Study size | Age group          | Recruitment of participants                                                                                                 | Control group                                                                             | Follow-up | Outcomes included                                                                                       |
|---------------------------------|--------------|-------------------|----------------------------------------------|--------------|--------------------------------------------------------------------------------------------|---------------|-----------------|------------|--------------------|-----------------------------------------------------------------------------------------------------------------------------|-------------------------------------------------------------------------------------------|-----------|---------------------------------------------------------------------------------------------------------|
| Wolff 2001 MWI <sup>68</sup>    | Malawi       | Rural             | Not stated                                   | Moderate     | Not reported                                                                               | Not reported  | Cross-sectional | 318        | 0–5 years          | Residents of randomly selected houses built by Habitat for Humanity International and the closest traditional house to each | n/a                                                                                       | n/a       | Malaria infection (microscopy)                                                                          |
| Woyessa 2013 ETH <sup>69</sup>  | Ethiopia     | Rural             | Not stated                                   | Low          | 29% households own at least one ITN                                                        | Some coverage | Cross-sectional | 3398       | All ages           | Households randomly selected from six administrative areas                                                                  | n/a                                                                                       | n/a       | Malaria infection (microscopy)                                                                          |
| Yamamoto 2010 BFA <sup>70</sup> | Burkina Faso | Peri-urban        | Not stated                                   | High         | 49% participants resided in households reporting use of ITNs                               | Not reported  | Case-control    | 283        | 0–9 years          | Children presenting to district health facility with fever and parasitaemia                                                 | Community controls: age, sex, ethnicity and residence matched, selected from DSS database | n/a       | Clinical malaria (microscopy)                                                                           |
| Ye 2006 BFA <sup>71</sup>       | Burkina Faso | Rural, peri-urban | Not stated                                   | High         | 53% reported use of any net                                                                | Not reported  | Cross-sectional | 661        | 6 months – 5 years | Randomly selected using cluster sampling from four DSS sites                                                                | n/a                                                                                       | n/a       | Malaria infection (microscopy)                                                                          |
| Yukich 2013 ETH <sup>72</sup>   | Ethiopia     | Urban and rural   | <i>An. arabiensis</i>                        | Low-moderate | 42% participants lived in homes owning at least one ITN, 19% used a ITN the previous night | Not reported  | Case-control    | 560        | ≥18 years          | Individuals presenting at local health facility with fever and malaria infection                                            | Individuals presenting at same health facility without malaria infection                  | n/a       | Malaria infection (microscopy and RDT)                                                                  |
| Zhou 2007 <sup>73</sup>         | Kenya        | Rural, highland   | <i>An. gambiae</i> s.s., <i>An. funestus</i> | High         | Not reported                                                                               | Not reported  | Cohort          | 871 houses | n/a                | Households randomly selected from two areas of 3x3km and 4x4km                                                              | n/a                                                                                       | 9 months  | Density of adult anophelines (mean number of <i>An. gambiae</i> s.s. per house (pyrethrum spray catch)) |

CDC: Centers for Disease Control and Prevention; OR: Odds Ratio; IRR: Incidence Rate Ratio; RDT: Rapid diagnostic test; ITN: Insecticide-treated net; LLIN: Long-lasting insecticidal net; IRS: Indoor residual spraying; PCD: Passive case detection; ACD: Active case detection; SES: socioeconomic status.

Tusting LS, Ippolito M, et al. The evidence for improving housing to reduce malaria: a systematic review and meta-analysis.

c. Characteristics of observational studies excluded from the quantitative analysis (n=18)

| Study                                   | Country           | Setting          | Primary vectors                                         | Transmission | LLIN coverage                                                        | IRS coverage | Study design    | Study size                                                                                      | Age group  | Recruitment of participants                                                                                  | Control group                                            | Follow – up | Reason for exclusion from quantitative analysis                                    |
|-----------------------------------------|-------------------|------------------|---------------------------------------------------------|--------------|----------------------------------------------------------------------|--------------|-----------------|-------------------------------------------------------------------------------------------------|------------|--------------------------------------------------------------------------------------------------------------|----------------------------------------------------------|-------------|------------------------------------------------------------------------------------|
| <b>Ayele 2012 ETH<sup>74</sup></b>      | Ethiopia          | Rural, highland  | <i>Not stated</i>                                       | Low          | Not reported                                                         | Not reported | Cross-sectional | 5708 households                                                                                 | Not stated | 224 clusters of 25 households randomly selected from census                                                  | n/a                                                      | n/a         | Confidence intervals cannot be replicated; data reporting not accurate             |
| <b>Ayele 2013 ETH<sup>75</sup></b>      | Ethiopia          | Rural, highland  | <i>Not stated</i>                                       | Low          | Not reported                                                         | Not reported | Cross-sectional | 5708 households                                                                                 | Not stated | 224 clusters of 25 households randomly selected from census                                                  | n/a                                                      | n/a         | Confidence intervals cannot be replicated; data reporting not accurate             |
| <b>Bell 1997<sup>76</sup></b>           | Solomon Islands   | Urban, coastal   | <i>An. farauti s.l., An. punctulatus, An. koliensis</i> | Moderate     | 29.5% (any net); 12.7% (ITN)                                         | Not reported | Cross-sectional | 309                                                                                             | >=16 years | Every second outpatient from study health facilities recruited if consent given and aged at least 16 yrs     | n/a                                                      | n/a         | No confidence intervals given; direction of comparison unclear                     |
| <b>Cano 2006<sup>77</sup></b>           | Equatorial Guinea | Rural            | <i>An. gambiae s.s., An. moucheti, An. carnevalei</i>   | High         | 31% slept under bednet (any)                                         | Not reported | Cohort          | One village with 37 households, each of which was surveyed 6–8 times over the collection period | n/a        | Two sentinel houses were purposefully selected; 5 light traps were circulated among the remaining households | n/a                                                      | 42 days     | Regression coefficients given only                                                 |
| <b>de Barros 2011<sup>78</sup></b>      | Brazil            | Rural            | <i>An. darlingi</i>                                     | Not reported | 4% families reported sleeping under nets                             | Not reported | Cohort          | 333                                                                                             | All ages   | All residents of a side road                                                                                 | n/a                                                      | 30 months   | Regression coefficients only                                                       |
| <b>Kibret 2010<sup>79</sup></b>         | Ethiopia          | Rural, semi-arid | <i>An. arabiensis, An. pharoensis</i>                   | Moderate     | Not reported                                                         | Not reported | Cross-sectional | 2435                                                                                            | All ages   | Households randomly selected from two villages                                                               | n/a                                                      | n/a         | Regression coefficients only                                                       |
| <b>Lwetoijera 2013 TZA<sup>80</sup></b> | Tanzania          | Rural            | <i>An. gambiae s.l., An. funestus</i>                   | Not reported | 100% households owned treated nets, 32% households owned mainly ITNs | Not reported | Cohort          | 72 randomly selected houses each month                                                          | n/a        | Randomly selected from two villages each month                                                               | n/a                                                      | 48 months   | Regression coefficients given only                                                 |
| <b>Mala 2011<sup>81</sup></b>           | Kenya             | Rural            | <i>An. arabiensis</i>                                   | Not reported | Not reported                                                         | Not reported | Cohort          | 20 houses                                                                                       | n/a        | 10 houses randomly selected from each of two sites                                                           | n/a                                                      | 22 months   | Regression coefficients given only                                                 |
| <b>Manah 2012<sup>82, 83</sup></b>      | Malaysia          | Rural            | <i>Not stated</i>                                       | Low          | Not reported                                                         | Not reported | Case-control    | 332                                                                                             | All ages   | All malaria cases notified to the district health office within study period                                 | Age- and sex-matched controls (no further details given) | n/a         | House structure described as a risk factor for malaria infection but no data given |
| <b>Muturi 2008</b>                      | Kenya             | Rural            | <i>An. arabiensis, An. pharoensis</i>                   | Not reported | Not reported                                                         | Not reported | Cohort          | 30 houses                                                                                       | n/a        | Randomly selected from 3 study sites                                                                         | n/a                                                      | 12 months   | Regression coefficients given only                                                 |
| <b>Nkuo-Akenji 2006<sup>84</sup></b>    | Cameroon          | Rural            | <i>An. gambiae; A. funestus</i>                         | High         | Not reported                                                         | Not reported | Cross-sectional | 208                                                                                             | 0–14 years | Selected from community (not stated how)                                                                     | n/a                                                      | n/a         | Confidence intervals not reported                                                  |

c. Characteristics of observational studies excluded from the quantitative analysis (n=18) (continued)

| Study                                      | Country       | Setting    | Primary vectors                               | Transmission | LLIN coverage                                                     | IRS coverage                                              | Study design    | Study size                                             | Age group | Recruitment of participants                                                                                         | Control group | Follow – up                   | Reason for exclusion from quantitative analysis                                    |
|--------------------------------------------|---------------|------------|-----------------------------------------------|--------------|-------------------------------------------------------------------|-----------------------------------------------------------|-----------------|--------------------------------------------------------|-----------|---------------------------------------------------------------------------------------------------------------------|---------------|-------------------------------|------------------------------------------------------------------------------------|
| <b>Palsson 2004</b> <sup>85</sup>          | Guinea Bissau | Peri-urban | <i>An. gambiae</i> s.l., <i>An. squamosus</i> | Moderate     | 94% people reported sleeping under nets (any)                     | Not reported                                              | Cohort          | 30 houses sampled three times during each rainy season | n/a       | 10 houses selected from each of three areas (not stated how)                                                        | n/a           | 26 months (rainy season only) | Regression coefficients given only                                                 |
| <b>Somi 2007</b> <sup>86</sup>             | Tanzania      | Rural      | <i>Not stated</i>                             | High         | 50% people reported sleeping under any net, 18% under an ITN      | Not reported                                              | Cross-sectional | 2318 (household; with 7657 individuals)                | All ages  | Households randomly selected from two DSS sites                                                                     | n/a           | n/a                           | Regression coefficients only                                                       |
| <b>Somi 2008</b> <sup>87</sup>             | Tanzania      | Rural      | <i>Not stated</i>                             | High         | 79% people reported sleeping under any net, 27% under an ITN      | Not reported                                              | Cross-sectional | 557 (households; with 2034 individuals)                | All ages  | Households randomly selected from two DSS sites                                                                     | n/a           | n/a                           | Regression coefficients only                                                       |
| <b>Subramanian 1991</b> <sup>88</sup>      | India         | Rural      | <i>An. fluviatilis</i>                        | Moderate     | Not reported                                                      | Not reported                                              | Cohort          | 1461                                                   | All ages  | All inhabitants of one village                                                                                      | n/a           | 12 months                     | Insufficient data reported                                                         |
| <b>Sur 2006 IND</b> <sup>62</sup>          | India         | Urban      | <i>An. stephensi</i>                          | Low          | Very low                                                          | None                                                      | Cohort          | 60452                                                  | All ages  | Individuals reporting to a study health post with fever were screened; denominator was total population from census | None          | 12 months                     | Relative risk reported only                                                        |
| <b>Tilaye 2007 ETH</b> <sup>89</sup>       | Ethiopia      | Urban      | <i>Not reported</i>                           | Not reported | 38% individuals belonged to households owning at least one bednet | 18% individuals lived in homes with IRS in preceding year | Cross-sectional | 734                                                    | All ages  | Residents of households selected by multi-stage cluster sampling from three randomly selected administrative areas  | n/a           | n/a                           | House features included do not represent a comparison of modern versus traditional |
| <b>Van der Hoek 1998 LKA</b> <sup>90</sup> | Sri Lanka     | Rural      | <i>An. culicifacies</i>                       | Moderate     | 9% (any net)                                                      | 90%                                                       | Cohort          | 280                                                    | All ages  | All inhabitants of one village                                                                                      | n/a           | 12 months                     | Relative risk reported only                                                        |

ITN: Insecticide-treated net; LLIN: Long-lasting insecticidal net; IRS: Indoor residual spraying; PCD: Passive case detection; ACD: Active case detection; SES: socioeconomic status; DSS: Demographic Surveillance System

## References

1. Kampango A, Braganca M, Sousa BD, Charlwood JD. Netting barriers to prevent mosquito entry into houses in southern Mozambique: A pilot study. *Malar J* 2013; **12**: 1.
2. Kirby MJ, Ameh D, Bottomley C, et al. Effect of two different house screening interventions on exposure to malaria vectors and on anaemia in children in The Gambia: a randomised controlled trial. *Lancet* 2009; **374**: 998–1009.
3. Massebo F, Lindtjorn B. The effect of screening doors and windows on indoor density of *Anopheles arabiensis* in south–west Ethiopia: A randomized trial. *Malar J* 2013; **12**: 1.
4. Mng'ong'o FC, Sambali JJ, Sabas E, et al. Repellent plants provide affordable natural screening to prevent mosquito house entry in tropical rural settings—results from a pilot efficacy study. *PLoS ONE* 2011; **6**: 10.
5. Kirby MJ, Njie M, Dilger E, Lindsay SW. Importance of eaves to house entry by anopheline, but not culicine, mosquitoes. *J Med Entomol* 2009; **46**: 505–10.
6. Ogoma SB, Lweitoijera DW, Ngonyani H, et al. Screening mosquito house entry points as a potential method for integrated control of endophagic filariasis, arbovirus and malaria vectors. *PLoS Negl Trop Dis* 2010; **4**: 8.
7. Abe T, Honda S, Nakazawa S, et al. Risk factors for malaria infection among ethnic minorities in Binh Phuoc, Vietnam. *Southeast Asian J Trop Med Public Health* 2009; **40**: 18–29.
8. Adiamah JH, Koram KA, Thomson MC, Lindsay SW, Todd J, Greenwood BM. Entomological risk factors for severe malaria in a peri–urban area of The Gambia. *Ann Trop Med Parasitol* 1993; **87**: 491–500.
9. Al–Mekhlafi AM, Al–Mekhlafi HM, Mahdy MA, Azazy AA, Fong MY. Human malaria in the highlands of Yemen. *Ann Trop Med Parasitol* 2011; **105**: 187–95.
10. Al–Taiar A, Assabri A, Al–Habori M, et al. Socioeconomic and environmental factors important for acquiring non–severe malaria in children in Yemen: a case–control study. *Trans R Soc Trop Med Hyg* 2009; **103**: 72–8.
11. Animut A, Balkew M, Lindtjorn B. Impact of housing condition on indoor–biting and indoor–resting *Anopheles arabiensis* density in a highland area, central Ethiopia. *Malar J* 2013; **12**: 393.
12. Asante KP, Owusu–Agyei S, Cairns M, et al. Placental malaria and the risk of malaria in infants in a high malaria transmission area in Ghana: A prospective cohort study. *J Infect Dis* 2013; **208**: 1504–13.
13. Barber M, Rice J. Malaria studies in Greece – The relation to housing to malaria in certain villages of East Macedonia. *Am J Hyg* 1935; **22**: 512–38.
14. Bosman A, Modiano D, Voglino MC, et al. Malaria transmission in a central area of Futa Djalon (Guinea): results of a parasitological survey during the 1989 rainy season. *Parassitologia* 1992; **34**: 135–42.
15. Bradley J, Rehman AM, Schwabe C, et al. Reduced prevalence of malaria infection in children living in houses with window screening or closed eaves on Bioko Island, Equatorial Guinea. *PLoS ONE* 2013; **8**: e80626.
16. Briggs–Watson R, Maher H. An evaluation of mosquito–proofing for malaria control based on one year's observations. *Am J Hyg* 1940; **34**: 86–94.
17. Brooker S, Clarke S, Njagi JK, et al. Spatial clustering of malaria and associated risk factors during an epidemic in a highland area of western Kenya. *Trop Med Int Health* 2004; **9**: 757–66.
18. Burkot TR, Dye C, Graves PM. An analysis of some factors determining the sporozoite rates, human blood indexes, and biting rates of members of the *Anopheles punctulatus* complex in Papua New Guinea. *Am J Trop Med Hyg* 1989; **40**: 229–34.

**Tusting LS, Ippolito M, et al. The evidence for improving housing to reduce malaria: a systematic review and meta-analysis.**

19. Butraporn P, Sornmani S, Hungsapruet T. Social, behavioural, housing factors and their interactive effects associated with malaria occurrence in east Thailand. *Southeast Asian J Trop Med Public Health* 1986; **17**: 386–92.
20. Charlwood JD, Pinto J, Ferrara PR, et al. Raised houses reduce mosquito bites. *Malar J* 2003; **2**: 45.
21. Coleman M, Coleman M, Mabaso ML, et al. Household and microeconomic factors associated with malaria in Mpumalanga, South Africa. *Trans R Soc Trop Med Hyg* 2010; **104**: 143–7.
22. Coogle C. Preliminary report of screening studies in Leflore County, Miss. *Pub Health Rep* 1927; **42**: 1101.
23. Dahesh SM, Bassiouny HK, El-Masry SA. Socioeconomic and environmental factors affecting malaria infection in Fayoum Governorate, Egypt. *J Egypt Soc Parasitol* 2009; **39**: 511–23.
24. Danis-Lozano R, Rodriguez MH, Betanzos-Reyes AF, et al. Individual risk factors for *Plasmodium vivax* infection in the residual malaria transmission focus of Oaxaca, Mexico. *Salud Publica de Mexico* 2007; **49**: 199–209.
25. de Almeida A, do Rosario VE, Arez AP, Cravo P. Malaria epidemiology in the Democratic Republic of East Timor. *Asian Pacific J Trop Med* 2010; **3**: 283–7.
26. De Beudrap P, Nabasumba C, Grandesso F, et al. Heterogeneous decrease in malaria prevalence in children over a six-year period in south-western Uganda. *Malar J* 2011; **10**: 132.
27. Ekpenyong EA, Eyo JE. Malaria control and treatment strategies among school children in semi-urban tropical communities. *West Indian Med J* 2008; **57**: 456–61.
28. Ernst KC, Lindblade KA, Koech D, et al. Environmental, socio-demographic and behavioural determinants of malaria risk in the western Kenyan highlands: a case-control study. *Trop Med Int Health* 2009; **14**: 1258–65.
29. Gamage-Mendis AC, Carter R, Mendis C, De Zoysa APK, Herath PRJ, Mendis KN. Clustering of malaria infections within an endemic population: Risk of malaria associated with the type of housing construction. *Am J Trop Med Hyg* 1991; **45**: 77–85.
30. Geissbuhler Y, Chaki P, Emidi B, et al. Interdependence of domestic malaria prevention measures and mosquito-human interactions in urban Dar es Salaam, Tanzania. *Malar J* 2007; **6**: 126.
31. Ghebreyesus TA, Haile M, Witten KH, et al. Household risk factors for malaria among children in the Ethiopian highlands. *Trans R Soc Trop Med Hyg* 2000; **94**: 17–21.
32. Guthmann JP, Hall AJ, Jaffar S, Palacios A, Lines J, Llanos-Cuentas A. Environmental risk factors for clinical malaria: a case-control study in the Grau region of Peru. *Trans R Soc Trop Med Hyg* 2001; **95**: 577–83.
33. Hagmann R, Charlwood JD, Gil V, Ferreira C, do Rosario V, Smith TA. Malaria and its possible control on the island of Principe. *Malar J* 2003; **2**: 15.
34. Haque U, Glass GE, Bomblies A, et al. Risk factors associated with clinical malaria episodes in Bangladesh: a longitudinal study. *Am J Trop Med Hyg* 2013; **88**: 727–32.
35. Hiscox A, Khammanithong P, Kaul S, et al. Risk factors for mosquito house entry in the Lao PDR. *PLoS One* 2013; **8**: e62769.
36. Hustache S, Nacher M, Djossou F, Carme B. Malaria risk factors in Amerindian children in French Guiana. *Am J Trop Med Hyg* 2007; **76**: 619–25.
37. Kaur G. Predictors of malaria among Malaysian aborigines. *Asia-Pacific J Public Health / Asia-Pacific Academic Consortium for Public Health* 2009; **21**: 205–15.
38. Kirby MJ, Green C, Milligan PM, et al. Risk factors for house-entry by malaria vectors in a rural town and satellite villages in The Gambia. *Malar J* 2008; **7**: 2.



**Tusting LS, Ippolito M, et al. The evidence for improving housing to reduce malaria: a systematic review and meta-analysis.**

39. Konradsen F, Amerasinghe P, van der Hoek W, Amerasinghe F, Perera D, Piyaratne M. Strong association between house characteristics and malaria vectors in Sri Lanka. *Am J Trop Med Hyg* 2003; **68**: 177–81.
40. Koram KA, Bennett S, Adiamah JH, Greenwood BM. Socio-economic risk factors for malaria in a peri-urban area of The Gambia. *Trans R Soc Trop Med Hyg* 1995; **89**: 146–50.
41. Kreuels B, Kobbe R, Adjei S, et al. Spatial variation of malaria incidence in young children from a geographically homogeneous area with high endemicity. *J Infect Dis* 2008; **197**: 85–93.
42. Lindsay SW, Snow RW. The trouble with eaves; house entry by vectors of malaria. *Trans R Soc Trop Med Hyg* 1988; **82**: 645–6.
43. Lindsay SW, Armstrong Schellenberg JRM, Zeiler HA, Daly RJ, Salum FM, Wilkins HA. Exposure of Gambian children to *Anopheles gambiae* malaria vectors in an irrigated rice production area. *Med Vet Entomol* 1995; **9**: 50–8.
44. Liu JX, Bousema T, Zelman B, et al. Is housing quality associated with malaria incidence among young children and mosquito vector numbers? Evidence from Korogwe, Tanzania *PLoS ONE* 2014; **9**: e87358.
45. Magalhaes RJ, Langa A, Sousa-Figueiredo JC, Clements AC, Nery SV. Finding malaria hot-spots in northern Angola: the role of individual, household and environmental factors within a meso-endemic area. *Malar J* 2012; **11**: 385.
46. Maheu-Giroux M, Casapia M, Soto-Calle VE, et al. Are fish farming activities contributing to malaria transmission in the Peruvian Amazon? *Am J Trop Med Hyg* 2009; **81**: 52–3.
47. Malik EM, Ahmed ES, Elkhalfifa SM, Hussein MA, Sulieman AM. Stratification of Khartoum urban area by the risk of malaria transmission. *E Med Health J* 2003; **9**: 559–69.
48. Mmbando BP, Kamugisha ML, Lusingu JP, et al. Spatial variation and socio-economic determinants of *Plasmodium falciparum* infection in northeastern Tanzania. *Malar J* 2011; **10**: 145.
49. Mutuku FM, King CH, Mungai P, et al. Impact of insecticide-treated bed nets on malaria transmission indices on the south coast of Kenya. *Malar J* 2011; **10**: 356.
50. Nahum A, Erhart A, Maye A, et al. Malaria incidence and prevalence among children living in a peri-urban area on the coast of Benin, west Africa: a longitudinal study. *Am J Trop Med Hyg* 2010; **83**: 465–73.
51. Oesterholt MJ, Bousema JT, Mwerinde OK, et al. Spatial and temporal variation in malaria transmission in a low endemicity area in northern Tanzania. *Malar J* 2006; **5**: 98.
52. Ong'echa JM, Keller CC, Were T, et al. Parasitemia, anemia, and malarial anemia in infants and young children in a rural holoendemic *Plasmodium falciparum* transmission area. *Am J Trop Med Hyg* 2006; **74**: 376–85.
53. Osterbauer B, Kapisi J, Bigira V, et al. Factors associated with malaria parasitaemia, malnutrition, and anaemia among HIV-exposed and unexposed Ugandan infants: a cross-sectional survey. *Malar J* 2012; **11**: 432.
54. Ouma P, Eijk A, Hamel M, et al. Malaria and anaemia among pregnant women at first antenatal clinic visit in Kisumu, western Kenya. *Trop Med Int Health* 2007; **12**: 1515–23.
55. Pardo G, Descalzo MA, Molina L, et al. Impact of different strategies to control *Plasmodium* infection and anaemia on the island of Bioko (Equatorial Guinea). *Malar J* 2006; **5**: 10.
56. Peterson I, Borrell LN, El-Sadr W, Teklehaimanot A. Individual and household level factors associated with malaria incidence in a highland region of Ethiopia: a multilevel analysis. *Am J Trop Med Hyg* 2009; **80**: 103–11.
57. Peterson I, Borrell LN, El-Sadr W, Teklehaimanot A. A temporal-spatial analysis of malaria transmission in Adama, Ethiopia. *Am J Trop Med Hyg* 2009; **81**: 944–9.

**Tusting LS, Ippolito M, et al. The evidence for improving housing to reduce malaria: a systematic review and meta-analysis.**

58. Rulisa S, Kateera F, Bizimana JP, et al. Malaria prevalence, spatial clustering and risk factors in a low endemic area of Eastern Rwanda: a cross sectional study. *PLoS One* 2013; **8**: e69443.
59. Russell TL, Lwetoijera DW, Knols BG, Takken W, Killeen GF, Kelly–Hope LA. Geographic coincidence of increased malaria transmission hazard and vulnerability occurring at the periphery of two Tanzanian villages. *Malar J* 2013; **12**: 24.
60. Sintasath DM, Ghebremeskel T, Lynch M, et al. Malaria prevalence and associated risk factors in Eritrea. *Am J Trop Med Hyg* 2005; **72**: 682–7.
61. Siri JG, Wilson ML, Murray S, et al. Significance of travel to rural areas as a risk factor for malarial anemia in an urban setting. *Am J Trop Med Hyg* 2010; **82**: 391–7.
62. Sur D, von Seidlein L, Manna B, et al. The malaria and typhoid fever burden in the slums of Kolkata, India: data from a prospective community–based study. *Trans R Soc Trop Med Hyg* 2006; **100**: 725–33.
63. Temu EA, Coleman M, Abilio AP, Kleinschmidt I. High prevalence of malaria in Zambezia, Mozambique: the protective effect of IRS versus increased risks due to pig–keeping and house construction. *PLoS One* 2012; **7**: e31409.
64. Townes LR, Mwandama D, Mathanga DP, Wilson ML. Elevated dry–season malaria prevalence associated with fine–scale spatial patterns of environmental risk: a case–control study of children in rural Malawi. *Malar J* 2013; **12**: 407.
65. Van Der Hoek W, Konradsen F, Amerasinghe PH, Perera D, Piyaratne MK, Amerasinghe FP. Towards a risk map of malaria for Sri Lanka: the importance of house location relative to vector breeding sites. *Int J Epidemiol* 2003; **32**: 280–5.
66. Wanzirah H, Tusting LS, Arinaitwe E, et al. Mind the gap: house structure and the risk of malaria in Uganda. *PLoS ONE* 2014; **10**: e0117396
67. Winskill P, Rowland M, Mtove G, Malima RC, Kirby MJ. Malaria risk factors in north–east Tanzania. *Malar J* 2011; **10**: 98.
68. Wolff CG, Schroeder DG, Young MW. Effect of improved housing on illness in children under 5 years old in northern Malawi: cross sectional study. *BMJ* 2001; **322**: 1209–12.
69. Woyessa A, Deressa W, Ali A, Lindtjorn B. Malaria risk factors in Butajira area, south–central Ethiopia: a multilevel analysis. *Malar J* 2013; **12**: 273.
70. Yamamoto S, Louis VR, Sie A, Sauerborn R. Household risk factors for clinical malaria in a semi–urban area of Burkina Faso: a case–control study. *Trans R Soc Trop Med Hyg* 2010; **104**: 61–5.
71. Ye Y, Hoshen M, Louis V, Seraphin S, Traore I, Sauerborn R. Housing conditions and *Plasmodium falciparum* infection: protective effect of iron–sheet roofed houses. *Malar J* 2006; **5**: 8.
72. Yukich JO, Taylor C, Eisele TP, et al. Travel history and malaria infection risk in a low–transmission setting in Ethiopia: a case control study. *Malar J* 2013; **12**: 33.
73. Zhou G, Munga S, Minakawa N, Githeko AK, Yan G. Spatial relationship between adult malaria vector abundance and environmental factors in western Kenya highlands. *Am J Trop Med Hyg* 2007; **77**: 29–35.
74. Ayele DG, Zewotir TT, Mwambi HG. Prevalence and risk factors of malaria in Ethiopia. *Malar J* 2012; **11**: 195.
75. Ayele DG, Zewotir TT, Mwambi HG. Spatial distribution of malaria problem in three regions of Ethiopia. *Malar J* 2013; **12**: 207.



**Tusting LS, Ippolito M, et al. The evidence for improving housing to reduce malaria: a systematic review and meta-analysis.**

76. Bell D, Bryan J, Cameron A, Fernando M, Leafasia J, Pholsyna K. Malaria in Honiara, Solomon Islands: reasons for presentation and human and environmental factors influencing prevalence. *Southeast Asian J Trop Med Public Health* 1997; **28**: 482–8.
77. Cano J, Descalzo MA, Moreno M, et al. Spatial variability in the density, distribution and vectorial capacity of anopheline species in a high transmission village (Equatorial Guinea). *Malar J* 2006; **5**: 21.
78. de Barros FS, Honorio NA, Arruda ME. Temporal and spatial distribution of malaria within an agricultural settlement of the Brazilian Amazon. *J Vector Ecol* 2011; **36**: 159–69.
79. Kibret S, Alemu Y, Boelee E, Tekie H, Alemu D, Petros B. The impact of a small–scale irrigation scheme on malaria transmission in Ziway area, Central Ethiopia. *Trop Med Int Health* 2010; **15**: 41–50.
80. Lwetoijera DW, Kiware SS, Mageni ZD, et al. A need for better housing to further reduce indoor malaria transmission in areas with high bed net coverage. *Parasites Vectors* 2013; **6**: 57.
81. Mala AO, Irungu LW, Shililu JI, et al. Plasmodium falciparum transmission and aridity: a Kenyan experience from the dry lands of Baringo and its implications for Anopheles arabiensis control. *Malar J* 2011; **10**: 121.
82. Manah AM, Shah SA, Hassan R, Ibrahim MY. The influence of environmental risk factors and individual behaviors on malaria occurrence in lahad datu district of sabah, Malaysia: A case control study. *Am J Trop Med Hyg* 2012; **87**: 107–8.
83. Muturi EJ, Shililu JI, Jacob BG, et al. Diversity of riceland mosquitoes and factors affecting their occurrence and distribution in Mwea, Kenya. *J Am Mosq Contr Assoc* 2008; **24**: 349–58.
84. Nkuo–Akenji T, Ntonifor NN, Ndukum MB, et al. Environmental factors affecting malaria parasite prevalence in rural Bolifamba, South West Cameroon. *Afr J Health Sci* 2006; **13**: 40–6.
85. Palsson K, Jaenson TG, Dias F, Laugen AT, Bjorkman A. Endophilic Anopheles mosquitoes in Guinea Bissau, west Africa, in relation to human housing conditions. *J Med Entomol* 2004; **41**: 746–52.
86. Somi MF, Butler JR, Vahid F, Njau J, Kachur SP, Abdulla S. Is there evidence for dual causation between malaria and socioeconomic status? Findings from rural Tanzania. *Am J Trop Med Hyg* 2007; **77**: 1020–7.
87. Somi MF, Butler JR, Vahid F, Njau JD, Kachur SP, Abdulla S. Use of proxy measures in estimating socioeconomic inequalities in malaria prevalence. *Trop Med Int Health* 2008; **13**: 354–64.
88. Subramanian S, Manoharan A, Sahu S, et al. Living conditions and occurrence of malaria in a rural community. *Indian J Malariol* 1991; **28**: 29–37.
89. Tilaye T, Deressa W. Prevalence of urban malaria and associated factors in Gondar Town, Northwest Ethiopia. *Ethiopian Med J* 2007; **45**: 151–8.
90. van der Hoek W, Konradsen F, Dijkstra DS, Amerasinghe PH, Amerasinghe FP. Risk factors for malaria: a microepidemiological study in a village in Sri Lanka. *Trans R Soc Trop Med Hyg* 1998; **92**: 265–9.
