# Supplementary material for: The evidence for improving housing to reduce malaria: a systematic review and meta-analysis
Source: Springer Nature journal article supplement (doi:10.1186/s12936-015-0724-1), 2015-05-18
Supplement: MOESM3 [file 9761322]

**Additional File 3. Risk of bias assessment**

**a. Risk of bias assessment for studies included in the quantitative analysis (intervention studies, n=6)**

| Reference             | Allocation sequence generation                                 | Allocation concealment                              | Baseline outcome measurements                                                     | Baseline features                                                                | Incomplete outcome data                  | Length of follow up                                        | Blinding (performance)                                                    | Blinding (detection)                   | Contamination                                             | Selective outcome reporting             | Recruitment bias                                            |
|-----------------------|----------------------------------------------------------------|-----------------------------------------------------|-----------------------------------------------------------------------------------|----------------------------------------------------------------------------------|------------------------------------------|------------------------------------------------------------|---------------------------------------------------------------------------|----------------------------------------|-----------------------------------------------------------|-----------------------------------------|-------------------------------------------------------------|
| <b>Kampango 2013</b>  | Low                                                            | High                                                | Unclear                                                                           | Unclear                                                                          | Low                                      | High                                                       | High                                                                      | High                                   | Low                                                       | Low                                     | Low                                                         |
|                       | Intervention randomly allocated                                | Patients and investigators could foresee assignment | No baseline measurement of outcome                                                | No information reported                                                          | Low missing data                         | Follow up period less than one year or transmission season | Performance bias possible due to knowledge of the allocated interventions | Primary outcomes not assessed blinded. | Unlikely that the control group received the intervention | All pre-specified outcomes are reported | No change in size or number of clusters after randomisation |
| <b>Kirby 2009</b>     | Low                                                            | High                                                | Low                                                                               | Low                                                                              | Low                                      | Low                                                        | High                                                                      | Low                                    | Low                                                       | Low                                     | Low                                                         |
|                       | Intervention randomly allocated                                | Patients and investigators could foresee assignment | Outcomes were measured pre intervention and adjusted for in analysis              | Baseline characteristics of the study and control areas are reported and similar | Low missing data, balanced across groups | Follow up period at least one transmission season          | Performance bias possible due to knowledge of the allocated interventions | Primary outcomes assessed blinded      | Unlikely that the control group received the intervention | All pre-specified outcomes are reported | No change in size or number of clusters after randomisation |
| <b>Massebo 2013</b>   | Low                                                            | High                                                | Low                                                                               | Low                                                                              | Low                                      | High                                                       | High                                                                      | High                                   | Low                                                       | Low                                     | Low                                                         |
|                       | Intervention randomly allocated                                | Patients and investigators could foresee assignment | Outcomes were measured pre intervention and no important differences were present | Baseline characteristics of the study and control areas are reported and similar | No missing data                          | Follow up period less than one year or transmission season | Performance bias possible due to knowledge of the allocated interventions | Primary outcomes not assessed blinded. | Unlikely that the control group received the intervention | All pre-specified outcomes are reported | No change in size or number of clusters after randomisation |
| <b>Mng'ong'o 2011</b> | Low                                                            | High                                                | Unclear                                                                           | High                                                                             | Unclear                                  | Low                                                        | High                                                                      | High                                   | Low                                                       | Low                                     | Low                                                         |
|                       | Houses selected in stepwise fashion starting from random point | Patients and investigators could foresee assignment | No baseline measurement of outcome                                                | Differences between control and intervention areas                               | No information reported                  | Follow up period at least one transmission season          | Performance bias possible due to knowledge of the allocated interventions | Primary outcomes not assessed blinded. | Unlikely that the control group received the intervention | All pre-specified outcomes are reported | No change in size or number of clusters after randomisation |
| <b>Njie 2009</b>      | Low                                                            | High                                                | Unclear                                                                           | Unclear                                                                          | Low                                      | High                                                       | High                                                                      | High                                   | Low                                                       | Low                                     | Low                                                         |
|                       | Intervention randomly allocated                                | Patients and investigators could foresee assignment | No baseline measurement of outcome                                                | No information                                                                   | Low missing data                         | Follow up period less than one year or transmission season | Performance bias possible due to knowledge of the allocated interventions | Primary outcomes not assessed blinded. | Unlikely that the control group received the intervention | All pre-specified outcomes are reported | No change in size or number of clusters after randomisation |
| <b>Ogoma 2010</b>     | Unclear                                                        | High                                                | Unclear                                                                           | Unclear                                                                          | Low                                      | High                                                       | High                                                                      | High                                   | Low                                                       | Low                                     | Low                                                         |
|                       | No information reported                                        | Patients and investigators could foresee assignment | No baseline measurement of outcome                                                | No information reported                                                          | Low missing data                         | Follow up period less than one year or transmission season | Performance bias possible due to knowledge of the allocated interventions | Primary outcomes not assessed blinded. | Unlikely that the control group received the intervention | All pre-specified outcomes are reported | No change in size or number of clusters after randomisation |

**b. Risk of bias assessment for studies included in the quantitative analysis (case-control studies, n=14)**

| Reference         | Selection                          |                                                                                   |                       |                                                                                  | Comparability                                                                                                                                                                             | Exposure                                                                         |                                                     |                                   | Overall quality assessment score (max 9) |
|-------------------|------------------------------------|-----------------------------------------------------------------------------------|-----------------------|----------------------------------------------------------------------------------|-------------------------------------------------------------------------------------------------------------------------------------------------------------------------------------------|----------------------------------------------------------------------------------|-----------------------------------------------------|-----------------------------------|------------------------------------------|
|                   | Is the case definition adequate?   | Representativeness of the cases                                                   | Selection of controls | Definition of controls                                                           | Comparability of cases and controls on the basis of the design or analysis                                                                                                                | Ascertainment of exposure                                                        | Same method of ascertainment for cases and controls | Non-response rate                 |                                          |
| Adiamah 1993      | Yes, with independent validation * | Consecutive or obviously representative series of cases *                         | Community controls *  | No clinical malaria *                                                            | Study controls for age *                                                                                                                                                                  | Structured interview and direct observation where blind to case/control status * | Yes *                                               | Not described                     | 7                                        |
| Al-Taiar 2009     | Yes, with independent validation * | Consecutive or obviously representative series of cases *                         | Community controls *  | No history of malaria in past 6 months *                                         | Study controls for age, location, area of residence, khat trees, larval habitats, IRS, history of travel**                                                                                | Interview not blinded to case/control status                                     | Yes *                                               | Non respondents described         | 7                                        |
| Brooker 2004      | Yes, with independent validation * | Consecutive or obviously representative series of cases *                         | Community controls *  | No malaria infection *                                                           | Study controls for age *                                                                                                                                                                  | Structured interview where blind to case/control status *                        | Yes *                                               | Not described                     | 7                                        |
| Butraporn 1986    | Yes, record linkage                | Consecutive or obviously representative series of cases *                         | Community controls *  | No malaria infection *                                                           | Study controls for age, gender *                                                                                                                                                          | Structured interview where blind to case/control status *                        | Yes *                                               | Not described                     | 6                                        |
| Coleman 2010      | Yes, record linkage                | Consecutive or obviously representative series of cases *                         | Community controls *  | Households with no confirmed case of clinical malaria during the study period *  | Study controls for household wealth *                                                                                                                                                     | Structured interview where blind to case/control status *                        | Yes *                                               | Not described                     | 6                                        |
| Danis-Lozano 2007 | Yes, with independent validation * | Potential for biases (not all incident cases were recruited, without explanation) | Community controls *  | No malaria infection *                                                           | Study controls for age, village, occupation **                                                                                                                                            | Structured interview where blind to case/control status *                        | Yes *                                               | Rate different and no designation | 7                                        |
| Ernst 2009        | Yes, record linkage                | Consecutive or obviously representative series of cases *                         | Community controls *  | No malaria symptoms or history of malaria (however not slide confirmed negative) | Study controls for age, study site **                                                                                                                                                     | Interview not blinded to case/control status                                     | Yes *                                               | Same rate for both groups *       | 6                                        |
| Guthman 2001      | Yes, with independent validation * | Consecutive or obviously representative series of cases *                         | Community controls *  | No clinical malaria or infection*                                                | Study controls for age, gender, area of residence, age of house, IRS in past six months, distance to nearest canal, agricultural work, education level **                                 | Structured interview where blind to case/control status *                        | Yes *                                               | No description                    | 8                                        |
| Koram 1995        | Yes, with independent validation * | Consecutive or obviously representative series of cases *                         | Community controls *  | No clinical malaria *                                                            | Study controls for age *                                                                                                                                                                  | Structured interview and direct observation *                                    | Yes *                                               | No description                    | 7                                        |
| Ong'Echa 2006     | Yes, with independent validation * | Consecutive or obviously representative series of cases *                         | Hospital controls     | No malaria infection or history of fever in past 14 days *                       | Study controls for age, axillary temperature $\geq 37.5^{\circ}\text{C}$ , wasting, caretaker education, occupation of household head and mother, bednet use, mosquito coil use **        | Structured interview; blinding not described                                     | Yes *                                               | Same rate for both groups *       | 7                                        |
| Siri 2010         | Yes, with independent validation * | Consecutive or obviously representative series of cases *                         | Community controls *  | No high parasitaemia or malaria anaemia *                                        | Study controls for age, mosquito coils, bednet ownership, sleeping in rural area, household head gender, wealth, land ownership, domestic animals in residence, crowding, urbanisation ** | Direct observation and interview not blind to case/control status                | No                                                  | No description                    | 6                                        |

Tusting LS, Ippolito M, et al. The evidence for improving housing to reduce malaria: a systematic review and meta-analysis.

**b. Risk of bias assessment for studies included in the quantitative analysis (case-control studies, n=14) (continued).**

| Reference         | Selection                        |                                                           |                       |                                            | Comparability                                                                                                                                  | Exposure                                                             |                                                     |                   | Overall quality assessment score (max 9) |
|-------------------|----------------------------------|-----------------------------------------------------------|-----------------------|--------------------------------------------|------------------------------------------------------------------------------------------------------------------------------------------------|----------------------------------------------------------------------|-----------------------------------------------------|-------------------|------------------------------------------|
|                   | Is the case definition adequate? | Representativeness of the cases                           | Selection of controls | Definition of controls                     | Comparability of cases and controls on the basis of the design or analysis                                                                     | Ascertainment of exposure                                            | Same method of ascertainment for cases and controls | Non-response rate |                                          |
| Van der Hoek 2003 | Yes, record linkage              | Consecutive or obviously representative series of cases * | Community controls *  | No malaria infection                       | Study controls for age, gender, distance to stream, distance to cattle shed, use of bednets, pyrethrum coils and traditional fumigants, IRS ** | Direct observation; not clear whether blinded to case/control status | Yes *                                               | No description    | 5                                        |
| Yanamoto 2010     | Yes, record linkage              | Consecutive or obviously representative series of cases * | Community controls *  | No description of malaria infection status | Study design controls for age *                                                                                                                | Direct observation *                                                 | Yes *                                               | No description    | 5                                        |
| Yukich 2013       | Yes, record linkage              | Consecutive or obviously representative series of cases * | Hospital controls     | No malaria infection *                     | Study does not control for other factors                                                                                                       | Structured interview where blind to case/control status *            | Yes *                                               | No description    | 4                                        |

ITN: Insecticide-treated net; LLIN: Long-lasting insecticidal net; IRS: Indoor residual spraying

Tusting LS, Ippolito M, et al. The evidence for improving housing to reduce malaria: a systematic review and meta-analysis.

c. Risk of bias assessment for studies included in the quantitative analysis (cross-sectional studies, n=31)

| Reference        | Selection                                                                                                   |                                | Comparability                                                                                                                                    | Exposure                  | Overall quality assessment score (max 5) |
|------------------|-------------------------------------------------------------------------------------------------------------|--------------------------------|--------------------------------------------------------------------------------------------------------------------------------------------------|---------------------------|------------------------------------------|
|                  | Representativeness of the sample                                                                            | Assessment of outcome          | Comparability of groups on the basis of the design or analysis                                                                                   | Ascertainment of exposure |                                          |
| Abe 2009         | Truly representative of the average individual or household in the community *                              | Independent blind assessment * | Study controls for age, numebr of family members, bednet use**                                                                                   | Structured interview*     | 5                                        |
| Al-Makhlafi 2011 | Somewhat representative of the average individual or household in the community *                           | Independent blind assessment * | Study does not control for other factors                                                                                                         | Structured interview*     | 3                                        |
| Barber 1935      | Truly representative of the average individual or household in the community *                              | Independent blind assessment * | Study does not control for other factors                                                                                                         | Direct observation *      | 3                                        |
| Bosman 1992      | No description of the derivation of the sample                                                              | Independent blind assessment * | Study does not control for other factors                                                                                                         | Secure record *           | 2                                        |
| Bradley 2013     | Truly representative of the average individual or household in the community *                              | Independent blind assessment * | Study controls for age, year of survey, spray coverage, net use, socioeconomic status, living in an urban area, crowding, eaves and screening ** | Secure record *           | 5                                        |
| Briggs-Watson    | No description of the derivation of the sample                                                              | Independent blind assessment * | Study does not control for other factors                                                                                                         | Direct observation *      | 2                                        |
| Burkot 1989      | No description of the derivation of the sample                                                              | Independent blind assessment * | Study does not control for other factors                                                                                                         | Direct observation *      | 2                                        |
| Charlwood 2003   | Truly representative of the average individual or household in the community *                              | Independent blind assessment * | Study does not control for other factors                                                                                                         | Direct observation *      | 3                                        |
| Dahesh 2009      | No description of the derivation of the sample                                                              | Independent blind assessment * | Study does not control for other factors                                                                                                         | Structured interview *    | 2                                        |
| de Almeida 2010  | No description of the derivation of the sample                                                              | Independent blind assessment * | Study does not control for other factors                                                                                                         | Structured interview *    | 2                                        |
| de Beaudrap 2010 | Somewhat representative of the average individual or household in the community (children aged 0–5 years) * | Independent blind assessment * | Study controls for age, weight-for-age, socioeconomic status, education level of household head, latitude, altitude, bednet use **               | Structured interview *    | 5                                        |
| Ekpenyong 2008   | Somewhat representative of the average individual or household in the community (school children) *         | Independent blind assessment * | Study does not control for other factors                                                                                                         | Structured interview *    | 3                                        |
| Geissbuhler 2007 | Truly representative of the average individual or household in the community *                              | Independent blind assessment * | Study does not control for other factors                                                                                                         | Direct observation *      | 3                                        |
| Hagmann 2003     | Truly representative of the average individual or household in the community *                              | Independent blind assessment * | Study does not control for other factors                                                                                                         | Structured interview *    | 3                                        |
| Hiscox 2013      | Truly representative of the average individual or household in the community *                              | Independent blind assessment * | Study controls for village, location of kitchen, wall material, veranda style, presence of animals *                                             | Visual observation *      | 4                                        |
| Kaur 2009        | Somewhat representative of the average individual or household in the community (77.5% response rate) *     | Independent blind assessment * | Study controls for age, protective clothing, going out at night, ever staying in another village **                                              | Structured interview *    | 5                                        |
| Kirby 2008       | Truly representative of the average individual or household in the community *                              | Independent blind assessment * | Study controls for distance to nearest pit latrine, horses in compound, eave type, crowding, churai in room *                                    | Visual observation *      | 4                                        |
| Magalhaes 2012   | Truly representative of the average individual or household in the community *                              | Independent blind assessment * | Study does not control for other factors                                                                                                         | Structured interview *    | 3                                        |
| Malik 2003       | Truly representative of the average individual or household in the community *                              | Independent blind assessment * | Study controls for age, gender, season, bednet use, distance to health facility, indoor breeding, region, IRS **                                 | Structured interview *    | 5                                        |
| Mmbando 2011     | Truly representative of the average individual or household in the community *                              | Independent blind assessment * | Study controls for age, bednet use, socioeconomic status, passive case detection, altitude, season **                                            | Structured interview *    | 5                                        |

Tusting LS, Ippolito M, et al. The evidence for improving housing to reduce malaria: a systematic review and meta-analysis.

c. Risk of bias assessment for studies included in the quantitative analysis (cross-sectional studies, n=31) (continued).

| Reference       | Selection                                                                                |                                | Comparability                                                                                                                                                               | Exposure                  | Overall quality assessment score (max 5) |
|-----------------|------------------------------------------------------------------------------------------|--------------------------------|-----------------------------------------------------------------------------------------------------------------------------------------------------------------------------|---------------------------|------------------------------------------|
|                 | Representativeness of the sample                                                         | Assessment of outcome          | Comparability of groups on the basis of the design or analysis                                                                                                              | Ascertainment of exposure |                                          |
| Osterbauer 2012 | Selected group (infants recruited at antenatal clinic)                                   | Independent blind assessment * | Study controls for age, HIV-exposure at birth, period of enrollment, gender, mother's age, bednet use, trimethoprim-sulphamethoxazole prophylaxis **                        | Structured interview *    | 4                                        |
| Ouma 2007       | Selected group (women attending antenatal clinic)                                        | Independent blind assessment * | Study controls for age, ethnicity, area of residence, spending night in malarious area, trimester, bednet use, treatment of bednet **                                       | Structured interview *    | 4                                        |
| Pardo 2006      | Truly representative of the average individual or household in the community *           | Independent blind assessment * | Study does not control for other factors                                                                                                                                    | Structured interview *    | 3                                        |
| Rulisa 2013     | Selected group (households in which one member presented to health facility with fever)  | Independent blind assessment * | Study controls for gender, age, positivity of study index case, bednet ownership, main roof material, presence of open water vessel, vegetation around home, electricity ** | Structured interview *    | 4                                        |
| Sintasath 2005  | Truly representative of the average individual or household in the community *           | Independent blind assessment * | Study controls for ecological strata, eaves, IRS, distance to river, rainfall *                                                                                             | Structured interview *    | 4                                        |
| Temu 2012       | Truly representative of the average individual or household in the community *           | Independent blind assessment * | Study controls for age, socioeconomic status, year of survey **                                                                                                             | Structured interview *    | 5                                        |
| Townes 2013     | Truly representative of the average individual or household in the community *           | Independent blind assessment * | Study does not control for other factors                                                                                                                                    | Structured interview *    | 3                                        |
| Winskill 2012   | Truly representative of the average individual or household in the community *           | Independent blind assessment * | Study does not control for other factors                                                                                                                                    | Structured interview *    | 3                                        |
| Wolff 2001      | Selected group (households who received Habitat for Humanity homes and their neighbours) | Independent blind assessment * | Study controls for water source, occupation, education, malaria knowledge, waste disposal method *                                                                          | Structured interview *    | 3                                        |
| Woyessa 2013    | Truly representative of the average individual or household in the community *           | Independent blind assessment * | Study does not control for other factors                                                                                                                                    | Structured interview *    | 3                                        |
| Ye 2006         | Truly representative of the average individual or household in the community *           | Independent blind assessment * | Study controls for site, presence of larval habitat, well and animal enclosure, bednet use *                                                                                | Structured interview *    | 4                                        |

ITN: Insecticide-treated net; LLIN: Long-lasting insecticidal net; IRS: Indoor residual spraying

Tusting LS, Ippolito M, et al. The evidence for improving housing to reduce malaria: a systematic review and meta-analysis.

d. Risk of bias assessment for studies included in the quantitative analysis (cohort studies, n=21)

| Reference        | Selection                                                                                                            |                                                          |                                | Comparability                                                                                                                                                                                                          | Exposure                  |                                                         |                                                                                     | Overall quality assessment score (max 9) |
|------------------|----------------------------------------------------------------------------------------------------------------------|----------------------------------------------------------|--------------------------------|------------------------------------------------------------------------------------------------------------------------------------------------------------------------------------------------------------------------|---------------------------|---------------------------------------------------------|-------------------------------------------------------------------------------------|------------------------------------------|
|                  | Representativeness of the sample                                                                                     | Selection of the non-exposed cohort                      | Assessment of outcome          | Comparability of groups on the basis of the design or analysis                                                                                                                                                         | Ascertainment of exposure | Was follow-up at least one transmission season or year? | Adequacy of follow up of cohorts                                                    |                                          |
| Animut 2013      | Truly representative of the average individual or household in the community *                                       | Drawn from the same community as the exposed cohort *    | Independent blind assessment * | Study does not control for other factors                                                                                                                                                                               | Direct observation *      | Yes *                                                   | Complete follow up *                                                                | 6                                        |
| Asante 2013      | Somewhat representative of the average individual or household in the community (infants only) *                     | Drawn from the same community as the exposed cohort *    | Independent blind assessment * | Study controls for age, mother's gravidity, primagravidae, wealth, maternal anaemia, urban or rural, distance to health facility, ITN use, malaria exposure score (based on sibling and neighbour malaria antibody) ** | Direct observation *      | Yes *                                                   | Subjects lost to follow up unlikely to introduce bias – small number lost (83.2%) * | 8                                        |
| Coogle 1927      | No description of the derivation of the cohort                                                                       | No description of the derivation of the unexposed cohort | No description                 | Study does not control for other factors                                                                                                                                                                               | No description            | No description                                          | No statement                                                                        | 0                                        |
| Game–Mendis 1991 | Truly representative of the average individual or household in the community *                                       | Drawn from the same community as the exposed cohort *    | Independent blind assessment * | Study does not control for other factors                                                                                                                                                                               | Direct observation *      | Yes *                                                   | No statement                                                                        | 5                                        |
| Ghebreyesus 2000 | Somewhat representative of the average individual or household in the community (children aged 0–10 years) *         | Drawn from the same community as the exposed cohort *    | Independent blind assessment * | Study adjusts for age, sex, time at risk, eave type, presence of windows, number of sleeping rooms, livestock ownership, radio ownership, water source, use of irrigated land **                                       | Structured interview *    | Yes *                                                   | Complete follow up *                                                                | 9                                        |
| Haque 2013       | Truly representative of the average individual or household in the community *                                       | Drawn from the same community as the exposed cohort *    | Record linkage *               | Study controls for bednet ratio, house density, distance to nearest streams, elevation *                                                                                                                               | Visual observation *      | Yes *                                                   | No statement                                                                        | 6                                        |
| Hustache 2007    | Somewhat representative of the average individual or household in the community *                                    | Drawn from the same community as the exposed cohort *    | Record linkage *               | Study does not control for other factors                                                                                                                                                                               | Direct observation *      | Yes *                                                   | No statement                                                                        | 5                                        |
| Konradsen 2000   | Truly representative of the average individual or household in the community *                                       | Drawn from the same community as the exposed cohort *    | Independent blind assessment * | Study does not control for other factors                                                                                                                                                                               | Direct observation *      | Yes *                                                   | Complete follow up *                                                                | 6                                        |
| Kreuels 2008     | Somewhat representative of the average individual or household in the community (infants enrolled into IPTi trial) * | Drawn from the same community as the exposed cohort *    | Independent blind assessment * | Study controls for village of residence *                                                                                                                                                                              | Structured interview *    | Yes *                                                   | No statement                                                                        | 6                                        |
| Lindsay 1988     | No description of the derivation of the cohort                                                                       | Drawn from the same community as the exposed cohort *    | No description                 | Study does not control for other factors                                                                                                                                                                               | No description            | Yes *                                                   | No statement                                                                        | 2                                        |

Tusting LS, Ippolito M, et al. The evidence for improving housing to reduce malaria: a systematic review and meta-analysis.

d. Risk of bias assessment for studies included in the quantitative analysis (cohort studies, n=21) (continued).

| Reference         | Selection                                                                                                     |                                                       |                                | Comparability                                                                                                                                    | Exposure                                                       |                           |                                                                             | Overall quality assessment score (max 5) |
|-------------------|---------------------------------------------------------------------------------------------------------------|-------------------------------------------------------|--------------------------------|--------------------------------------------------------------------------------------------------------------------------------------------------|----------------------------------------------------------------|---------------------------|-----------------------------------------------------------------------------|------------------------------------------|
|                   | Representativeness of the sample                                                                              | Selection of the non-exposed cohort                   | Assessment of outcome          |                                                                                                                                                  | Comparability of groups on the basis of the design or analysis | Ascertainment of exposure | Was follow-up at least one transmission season or year?                     |                                          |
| Lindsay 1988      | Truly representative of the average individual or household in the community *                                | Drawn from the same community as the exposed cohort * | Independent blind assessment * | Study does not control for other factors                                                                                                         | Direct observation *                                           | Yes *                     | Complete follow up *                                                        | 6                                        |
| Liu 2014          | Somewhat representative of the average individual in the community (infants enrolled into IPTi trial) *       | Drawn from the same community as the exposed cohort * | Independent blind assessment * | Study controls for age, mother's education, wealth index, bednet and repellent use, water source, electricity, urban or rural, IPTi trial arm ** | Direct observation *                                           | Yes *                     | Complete follow up *                                                        | 8                                        |
| Maheu-Giroux 2009 | Somewhat representative of the average individual in the community (90% residents consented to participate) * | Drawn from the same community as the exposed cohort * | Record linkage *               | Study does not control for other factors                                                                                                         | Structured interview *                                         | Yes *                     | Follow up rate <80% and no description of those lost                        | 5                                        |
| Mututi 2008       | Truly representative of the average individual or household in the community *                                | Drawn from the same community as the exposed cohort * | Independent blind assessment * | Study does not control for other factors                                                                                                         | Direct observation *                                           | Yes *                     | Complete follow up *                                                        | 6                                        |
| Nahum 2010        | Truly representative of the average individual or household in the community *                                | Drawn from the same community as the exposed cohort * | Independent blind assessment * | Study controls for sex, site, bed type, bednet use, pirogue, fishing net *                                                                       | Structured interview *                                         | Yes *                     | Subjects lost to follow up unlikely to introduce bias (small number lost) * | 7                                        |
| Oesterholt 2006   | Truly representative of the average individual or household in the community *                                | Drawn from the same community as the exposed cohort * | Record linkage *               | Study adjusts for age *                                                                                                                          | Structured interview *                                         | Yes *                     | Complete follow up *                                                        | 7                                        |
| Peterson 2009a    | Truly representative of the average individual or household in the community *                                | Drawn from the same community as the exposed cohort * | Record linkage *               | Study does not control for other factors                                                                                                         | Structured interview *                                         | No                        | No statement                                                                | 4                                        |
| Peterson 2009b    | Truly representative of the average individual or household in the community *                                | Drawn from the same community as the exposed cohort * | Record linkage *               | Study controls for bednet ownership, vegetation in compound, distance to larval habitats, temperature, rainfall, larval densities*               | Direct observation *                                           | No                        | No statement                                                                | 5                                        |
| Russell 2013      | Truly representative of the average individual or household in the community *                                | Drawn from the same community as the exposed cohort * | Independent blind assessment * | Study does not control for other factors                                                                                                         | Direct observation *                                           | Yes *                     | Complete follow up *                                                        | 6                                        |
| Wanzirah 2015     | Truly representative of the average individual or household in the community *                                | Drawn from the same community as the exposed cohort * | Independent blind assessment * | Study controls for age, gender, household wealth **                                                                                              | Direct observation *                                           | Yes *                     | Subjects lost to follow up unlikely to introduce bias (>80% follow-up)*     | 8                                        |
| Zhou 2007         | Truly representative of the average individual or household in the community *                                | Drawn from the same community as the exposed cohort * | Independent blind assessment * | Study does not control for other factors                                                                                                         | Direct observation *                                           | Yes *                     | Complete follow up *                                                        | 6                                        |

ITN: Insecticide-treated net; LLIN: Long-lasting insecticidal net; IRS: Indoor residual spraying; IPTi: intermittent preventive treatment in infants.
