# Supplementary material for: The evidence for improving housing to reduce malaria: a systematic review and meta-analysis
Source: Springer Nature journal article supplement (doi:10.1186/s12936-015-0724-1), 2015-05-18
Supplement: MOESM4 [file 12936_2015_724_MOESM4_ESM.pdf]

**Additional File 4. Funnel plots to assess publication bias in the meta-analysis of modern versus traditional housing.**

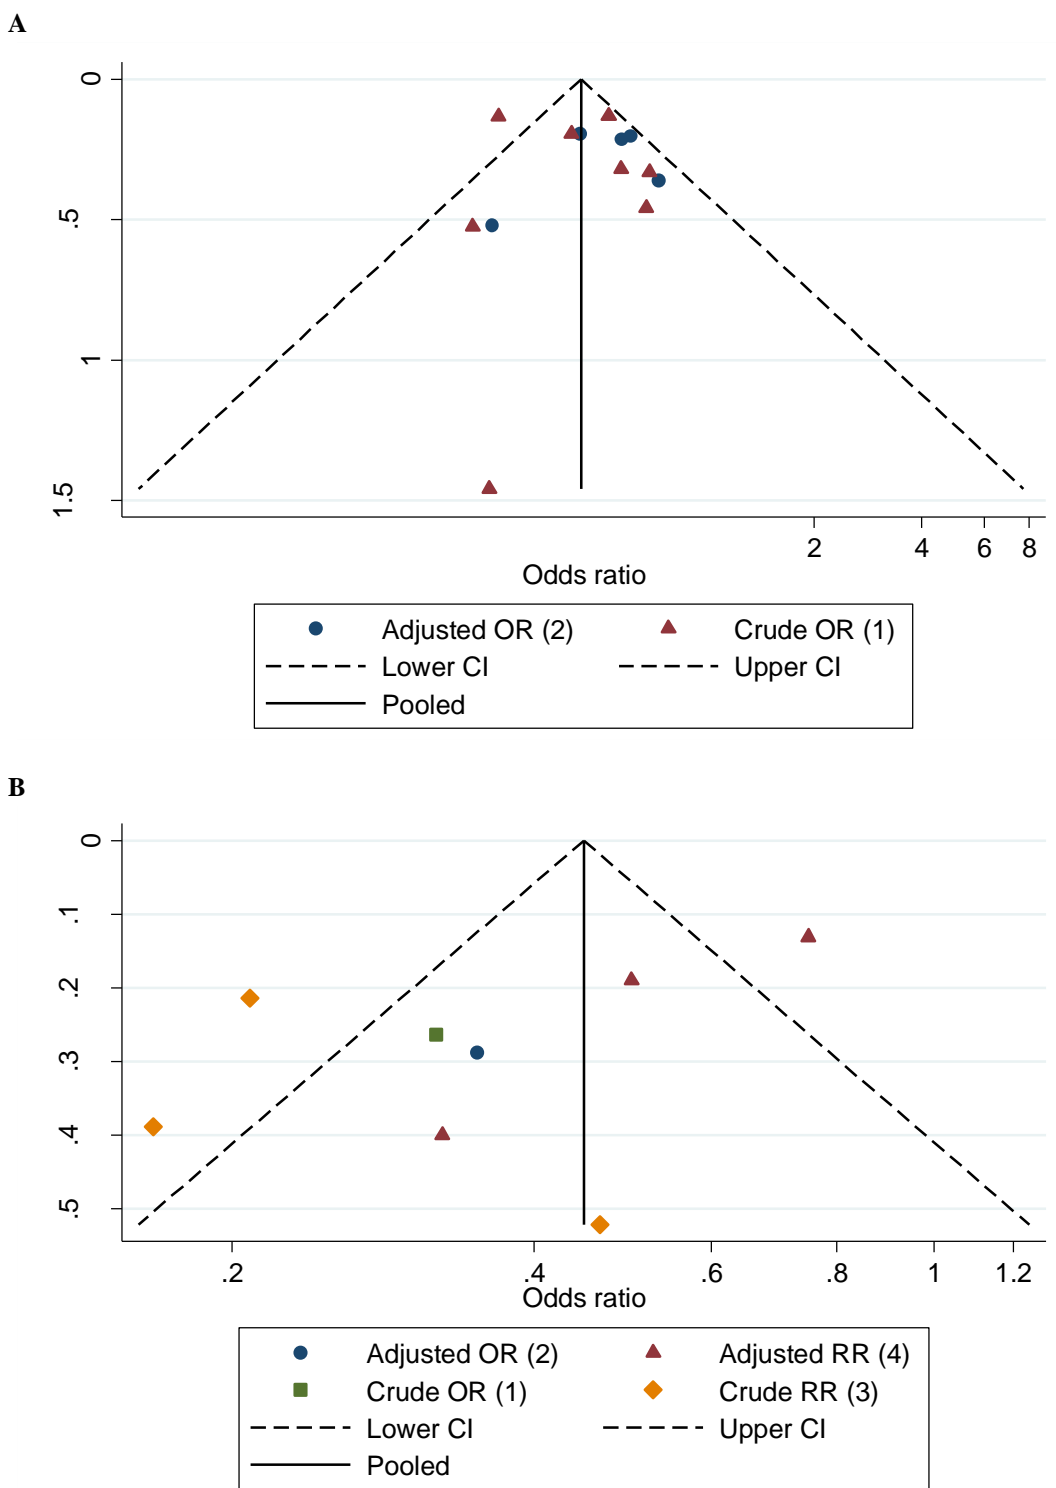

**Funnel plots to assess publication bias in the meta-analysis of modern versus traditional housing.**

Plots show study size as a function of effect size for studies included. Asymmetry is indicative of publication bias, selective outcome reporting, small-study effects, or selective analysis reporting. (A) Studies reporting malaria infection. 1: Case-control, cross-sectional and cohort studies: crude odds ratio, 2: Case-control, cross-sectional and cohort studies: adjusted odds ratio.

(B) Studies reporting clinical malaria. 1: Case-control and cross-sectional studies (crude odds ratio), 2: Case-control and cross-sectional studies (adjusted odds ratio), 3: Cohort studies (crude rate ratio), 4: Cohort studies (adjusted rate ratio).
