# Supplementary material for: The evidence for improving housing to reduce malaria: a systematic review and meta-analysis
Source: Springer Nature journal article supplement (doi:10.1186/s12936-015-0724-1), 2015-05-18
Supplement: MOESM5 [file 9761322]

## Additional File 5. Association between house construction and entomological outcomes

## a. Intervention studies

| Study reference        | Design                                        | Intervention (type of screening) | Comparison                                       | Outcome       | Measurement of outcome                                           | Mean density or rate |                  |                   |                  | Measure of effect                                                                                                                                   |                     |
|------------------------|-----------------------------------------------|----------------------------------|--------------------------------------------------|---------------|------------------------------------------------------------------|----------------------|------------------|-------------------|------------------|-----------------------------------------------------------------------------------------------------------------------------------------------------|---------------------|
|                        |                                               |                                  |                                                  |               |                                                                  | Pre-intervention     |                  | Post-intervention |                  |                                                                                                                                                     |                     |
|                        |                                               |                                  |                                                  |               |                                                                  | Control              | Treatment        | Control           | Treatment        |                                                                                                                                                     |                     |
| Massebo 2013           | RCS (pilot)                                   | Full                             | Screening vs no screening                        | HBR           | Mean number <i>An. arabiensis</i> per CDC light trap per night   | 20.1 (10.9–29.3)     | 20.3 (12.8–27.8) | 7.9 (6.5–10.1)    | 4.8 (3.9–6.2)    | Abundance ratio                                                                                                                                     | 0.61 (0.44–0.83)    |
| Mng'ong'o 2011         | RCS (pilot)                                   | Full                             | Lantana plant vs no Lantana plant                | HBR           | Mean number adult anophelines per CDC light trap per night       | n/a                  | n/a              | –                 | –                | Crude IRR                                                                                                                                           | 0.54 (0.40–0.73)    |
| Mng'ong'o 2011         | RCS (pilot)                                   | Full                             | Lantana plant vs no Lantana plant                | HBR           | Mean number adult anophelines per CDC light trap per night       | n/a                  | n/a              | –                 | –                | IRR adjusted for smoke stains                                                                                                                       | 0.503 (0.380–0.667) |
| Ogoma 2010             | Non-randomized cross-over study (pilot study) | Eaves                            | Screened eaves vs no screening                   | HBR           | Mean number <i>An. gambiae</i> s.l. per CDC light trap per night | n/a                  | n/a              | 80.0 (4–630)      | 59.0 (9–415)     | Relative Rate                                                                                                                                       | 0.91 (0.84–0.98)    |
| Ogoma 2010             | Non-randomized cross-over study (pilot)       | Windows                          | Screened windows vs no screening                 | HBR           | Mean number <i>An. gambiae</i> s.l. per CDC light trap per night | n/a                  | n/a              | 80.0 (4–630)      | 80.0 (15–370)    | Relative Rate                                                                                                                                       | 0.98 (0.94–1.02)    |
| Ogoma 2010             | Non-randomized cross-over study (pilot)       | Door                             | Screened doors vs no screening                   | HBR           | Mean number <i>An. gambiae</i> s.l. per CDC light trap per night | n/a                  | n/a              | 80.0 (4–630)      | 96.0 (17–700)    | Relative Rate                                                                                                                                       | 1.03 (0.97–1.09)    |
| Kirby 2009             | RCS                                           | Ceiling                          | Ceiling vs no screening                          | HBR           | Mean number <i>An. gambiae</i> s.l. per CDC light trap per night | n/a                  | n/a              | 37.5 (31.6–43.3)  | 19.1 (16.1–22.1) | Ratio of means for total <i>An. gambiae</i> s.l. over all trapping visits, adjusted for location, year, SES, wall material, horses, people in house | 0.60 (0.46–0.80)    |
| Kirby 2009             | RCS                                           | Full                             | Full vs no screening                             | HBR           | Mean number <i>An. gambiae</i> s.l. per CDC light trap per night | n/a                  | n/a              | 37.5 (31.6–43.3)  | 15.2 (12.9–17.4) | Ratio of means for total <i>An. gambiae</i> s.l. over all trapping visits, adjusted for location, year, SES, wall material, horses, people in house | 0.46 (0.34–0.63)    |
| Kirby 2009 (2006 data) | RCS                                           | Ceiling                          | Ceiling vs no screening                          | EIR           | Measured using CDC light traps                                   | n/a                  | n/a              | 2.27 (1.38–3.16)  | 1.14 (0.85–1.42) | Abundance ratio                                                                                                                                     | 0.50 (0.32–0.79)    |
| Kirby 2009 (2006 data) | RCS                                           | Full                             | Full vs no screening                             | EIR           | Measured using CDC light traps                                   | n/a                  | n/a              | 2.27 (1.38–3.16)  | 0.77 (0.57–0.96) | Abundance ratio                                                                                                                                     | 0.34 (0.21–0.54)    |
| Kirby 2009 (2007 data) | RCS                                           | Ceiling                          | Ceiling vs no screening                          | EIR           | Measured using CDC light traps                                   | n/a                  | n/a              | 1.35 (0.74–1.97)  | 0.90 (0.22–1.57) | Abundance ratio                                                                                                                                     | 0.67 (0.28–1.58)    |
| Kirby 2009 (2007 data) | RCS                                           | Full                             | Full vs no screening                             | EIR           | Measured using CDC light traps                                   | n/a                  | n/a              | 1.35 (0.74–1.97)  | 0.42 (0.24–0.63) | Abundance ratio                                                                                                                                     | 0.31 (0.16–0.59)    |
| Kampango 2013          | RCS (pilot)                                   | Eaves                            | Gables screened with local cloth vs no screening | HBR           | Mean number <i>An. funestus</i> per CDC light trap per night     | n/a                  | n/a              | 43.4 (38.0–49.6)  | 13.0 (10.7–15.7) | Crude IRR                                                                                                                                           | 0.3 (0.25–0.37)     |
| Kampango 2013          | RCS (pilot)                                   | Full                             | Gables screened with local cloth vs no screening | HBR           | Mean number <i>An. gambiae</i> s.l. per CDC light trap per night | n/a                  | n/a              | 6.88 (4.98–9.51)  | 2.13 (1.48–3.08) | Crude IRR                                                                                                                                           | 0.31 (0.19–0.50)    |
| Njie 2009              | Randomised cross-over study (pilot)           | Eaves                            | Screened eaves vs no screening                   | HBR           | Mean number <i>An. gambiae</i> s.l. per CDC light trap per night | n/a                  | n/a              | 6.1 (3.5–10.0)    | 2.1 (1.3–3.1)    | Percent reduction                                                                                                                                   | 0.34 (0.18–0.67)    |
| Njie 2009              | Randomised cross-over study (pilot)           | Screened eaves                   | Screened eaves vs no screening                   | Adult density | Odds of finding <i>An. gambiae</i> in house (CDC light trap)     | n/a                  | n/a              | –                 | –                | OR adjusted for trapping week, crossover group, numbers of horses and cows in compounds                                                             | 0.34 (0.20–0.56)    |

Tusting LS, Ippolito M, et al. The evidence for improving housing to reduce malaria: a systematic review and meta-analysis.

b. Observational studies

| Reference          | House feature | Specific comparison                                                                                                               | Outcome                                                                                                    | Mean density or rate |                  | Measure of effect                                   | Crude results       | Adjusted results    | Factors adjusted for                                         |
|--------------------|---------------|-----------------------------------------------------------------------------------------------------------------------------------|------------------------------------------------------------------------------------------------------------|----------------------|------------------|-----------------------------------------------------|---------------------|---------------------|--------------------------------------------------------------|
|                    |               |                                                                                                                                   |                                                                                                            | Exposed              | Unexposed        |                                                     |                     |                     |                                                              |
| Barber 1935        | House type    | New (tiled roof, ceiling, non-leaky) vs old (thatched roof, reed or no ceiling, in poor condition)                                | Density of adult anophelines (mean number <i>An. elutus</i> and <i>An. maculipennis</i> per resting catch) | 6.8                  | 9.4              | None reported                                       | –                   | –                   | n/a                                                          |
| Bosman 1992        | House type    | Modern vs traditional                                                                                                             | Density of adult Anophelines (August monthly mean number adult Anopheles per pyrethrum spray catch)        | –                    | –                | None reported                                       | –                   | –                   | n/a                                                          |
| Gamage-Mendis 1991 | House type    | Poor vs good                                                                                                                      | Indoor resting density (geometric mean number of <i>Anopheles</i> per trap per night)                      | 3.42                 | 1.95             | None reported                                       | –                   | –                   | n/a                                                          |
| Hiscox 2013        | Village type  | Modern vs traditional homes                                                                                                       | Human biting rate (mean number of <i>Anopheles</i> per CDC light trap per night)                           | –                    | –                | IRR                                                 | 0.72 (0.45–1.14)    | –                   | n/a                                                          |
| Konradsen 2000     | House type    | Poor vs good                                                                                                                      | Presence (vs absence) of <i>An. culicifacies</i> in each collection (pyrethrum spray catch)                | –                    | –                | OR                                                  | 1.6 (1.1–2.1)       | –                   | n/a                                                          |
| Konradsen 2000     | House type    | Poor vs good                                                                                                                      | Presence (vs absence) of <i>An. subpictus</i> in each collection (pyrethrum spray catch)                   | –                    | –                | OR                                                  | 1.4 (1.1–1.7)       | –                   | n/a                                                          |
| Liu 2014           | House type    | Highest quintile of housing index compared to lowest quintile (based on roof, wall and floor material, ceiling, eaves, screening) | Density of adult anophelines (mean number of <i>Anopheles</i> collected per household)                     | –                    | –                | IRR                                                 | 0.334 (0.228–0.489) | 0.571 (0.373–0.874) | Cattle near house, water source, electricity, urban or rural |
| Mutuku 2011        | House type    | Poor vs good                                                                                                                      | Density of adult Anophelines (pyrethrum spray catch)                                                       | –                    | –                | IRR                                                 | 1.07 (0.72–1.44)    | –                   | n/a                                                          |
| Wanzirah 2015      | House type    | Modern vs traditional                                                                                                             | Human biting rate (mean number of <i>Anopheles</i> per CDC light trap per night)                           | –                    | –                | IRR                                                 | –                   | 0.48 (0.37–0.64)    | Study site, household wealth                                 |
| Coogle 1927        | Screening     | Screened vs unscreened                                                                                                            | Density of adult anophelines (mean number <i>An. quadrimaculatus</i> per home)                             | 2.2                  | –                | None reported                                       | –                   | –                   | n/a                                                          |
| Geissbuhler 2007   | Screening     | No ceiling and unscreened windows vs ceiling and screened windows                                                                 | Human biting rate (mean number of bites received by those sleeping indoors (HLC))                          | 4.4                  | 2.3              | None reported                                       | –                   | –                   | –                                                            |
| Zhou 2007          | Screening     | No screening vs screening                                                                                                         | Density of adult anophelines (mean number of <i>An. gambiae</i> s.s. per house (pyrethrum spray catch))    | 4.15 (3.95–5.35)     | 2.92 (2.08–3.76) | OR (proportion houses with <i>An. gambiae</i> s.s.) | 1.04 (1.01–1.07)    | –                   | n/a                                                          |
| Zhou 2007          | Screening     | No screening vs screening                                                                                                         | Density of adult anophelines (mean number of <i>An. funestus</i> per house (pyrethrum spray catch))        | 0.52 (0.37–0.67)     | 0.44 (0.29–0.59) | OR (proportion houses with <i>An. funestus</i> )    | 1.14 (1.09–1.20)    | –                   | n/a                                                          |

Tusting LS, Ippolito M, et al. The evidence for improving housing to reduce malaria: a systematic review and meta-analysis.

b. Observational studies (continued)

| Reference     | House feature       | Specific comparison                                    | Outcome                                                                                                 | Mean density or rate |                  | Measure of effect                                   | Crude results    | Adjusted results | Factors adjusted for                                                         |
|---------------|---------------------|--------------------------------------------------------|---------------------------------------------------------------------------------------------------------|----------------------|------------------|-----------------------------------------------------|------------------|------------------|------------------------------------------------------------------------------|
|               |                     |                                                        |                                                                                                         | Exposed              | Unexposed        |                                                     |                  |                  |                                                                              |
| Adiamah 1993  | Main wall material  | Mud vs brick/concrete                                  | Density of adult Anophelines (geometric mean number adult <i>Anopheles</i> per light trap catch)        | 24.6                 | 15.5             | None reported                                       | –                | –                | n/a                                                                          |
| Hiscox 2013   | Main wall material  | Other vs wood                                          | Human biting rate (mean number of <i>Anopheles</i> per CDC light trap per night)                        | –                    | –                | IRR                                                 | 1.83 (1.14–2.93) | 2.35 (1.30–4.23) | Village, location of kitchen, veranda style, presence of animals             |
| Kirby 2008    | Main wall material  | Mud vs cement                                          | Human biting rate (mean number of <i>Anopheles</i> per CDC light trap per night)                        | –                    | –                | IRR                                                 | 5.36 (3.92–7.31) | 1.44 (1.10–1.87) | Distance to nearest pit latrine, horses, eave type, crowding, churai in room |
| Zhou 2007     | Main wall material  | Mud vs brick                                           | Density of adult anophelines (mean number of <i>An. gambiae</i> s.s. per house (pyrethrum spray catch)) | 4.16 (3.24–5.08)     | 0.86 (0.53–1.19) | OR (proportion houses with <i>An. gambiae</i> s.s.) | 1.34 (1.29–1.40) | –                | n/a                                                                          |
| Zhou 2007     | Main wall material  | Mud vs brick                                           | Density of adult anophelines (mean number of <i>An. funestus</i> per house (pyrethrum spray catch))     | 0.53 (0.37–0.65)     | 0.22 (0.06–0.38) | OR (proportion houses with <i>An. funestus</i> )    | 1.87 (1.70–2.04) | –                | n/a                                                                          |
| Wanzirah 2015 | Main wall material  | Cement, wood or metal vs mud                           | Human biting rate (mean number of <i>Anopheles</i> per CDC light trap per night)                        | –                    | –                | IRR                                                 | –                | 0.63 (0.48–0.84) | Study site, household wealth                                                 |
| Hiscox 2013   | Main roof material  | Other vs iron                                          | Human biting rate (mean number of <i>Anopheles</i> per CDC light trap per night)                        | –                    | –                | IRR                                                 | 0.49 (0.16–1.44) | –                | n/a                                                                          |
| Kirby 2008    | Main roof type      | Thatch vs metal                                        | Human biting rate (mean number of <i>Anopheles</i> per CDC light trap per night)                        | –                    | –                | IRR                                                 | 1.15 (0.94–1.41) | –                | n/a                                                                          |
| Wanzirah 2015 | Main roof material  | Tiles or metal vs thatch                               | Human biting rate (mean number of <i>Anopheles</i> per CDC light trap per night)                        | –                    | –                | IRR                                                 | –                | 0.72 (0.52–1.00) | Study site, household wealth                                                 |
| Zhou 2007     | Main roof material  | Grass thatch vs iron sheet                             | Density of adult anophelines (mean number of <i>An. gambiae</i> s.s. per house (pyrethrum spray catch)) | 4.26 (3.15–5.37)     | 2.00 (1.33–2.67) | OR (proportion houses with <i>An. gambiae</i> s.s.) | 1.15 (1.12–1.19) | –                | n/a                                                                          |
| Zhou 2007     | Main roof material  | Grass thatch vs iron sheet                             | Density of adult anophelines (mean number of <i>An. funestus</i> per house (pyrethrum spray catch))     | 0.39 (0.27–0.51)     | 0.61 (0.39–0.83) | OR (proportion houses with <i>An. funestus</i> )    | 0.75 (0.71–0.79) | –                | n/a                                                                          |
| Wanzirah 2015 | Main floor material | Woods, bricks or cement vs earth, sand, dung or stones | Human biting rate (mean number of <i>Anopheles</i> per CDC light trap per night)                        | –                    | –                | IRR                                                 | –                | 0.42 (0.32–0.55) | Study site, household wealth                                                 |
| Adiamah 1993  | Eaves               | Presence vs absence of eaves                           | Density of adult Anophelines (geometric mean number adult <i>Anopheles</i> per light trap catch)        | 29.3                 | 14.6             | None reported                                       | –                | –                | n/a                                                                          |
| Animut 2013   | Eaves               | Open vs closed eaves                                   | Density of <i>An. arabiensis</i> (mean number <i>An. arabiensis</i> per CDC light trap per house)       | 0.97 (0.60–1.34)     | 0.66 (0.43–0.88) | Abundance Ratio                                     | 1.5 (0.9–2.4)    | –                | n/a                                                                          |

Tusting LS, Ippolito M, et al. The evidence for improving housing to reduce malaria: a systematic review and meta-analysis.

b. Observational studies (continued)

| Reference                 | House feature | Specific comparison                         | Outcome                                                                                           | Mean density or rate                                                                                                                                   |                   | Measure of effect | Crude results    | Adjusted results | Factors adjusted for                                                                  |
|---------------------------|---------------|---------------------------------------------|---------------------------------------------------------------------------------------------------|--------------------------------------------------------------------------------------------------------------------------------------------------------|-------------------|-------------------|------------------|------------------|---------------------------------------------------------------------------------------|
|                           |               |                                             |                                                                                                   | Exposed                                                                                                                                                | Unexposed         |                   |                  |                  |                                                                                       |
| Animut 2013               | Eaves         | Open vs closed eaves                        | Density of <i>An. arabiensis</i> (mean number <i>An. arabiensis</i> per pyrethrum spray catch)    | 5.67 (4.22–7.12)                                                                                                                                       | 0.77 (–0.15–1.69) | None reported     | 7.4 (2.2–24.4)   | –                | n/a                                                                                   |
| Kirby 2008                | Eaves         | Closed vs open                              | Human biting rate (mean number of <i>Anopheles</i> per CDC light trap per night)                  | –                                                                                                                                                      | –                 | IRR               | 0.38 (0.32–0.46) | –                | n/a                                                                                   |
| Kirby 2008                | Eaves         | Continuous variable (eave gap size)         | Human biting rate (mean number of <i>Anopheles</i> per CDC light trap per night)                  | –                                                                                                                                                      | –                 | IRR               | 1.06 (1.04–1.08) | 0.71 (0.60–0.85) | Distance to nearest pit latrine, horses, main wall material, crowding, churai in room |
| Lindsay 1988              | Eaves         | Open vs closed                              | Density of adult Anophelines (mean number of <i>Anopheles</i> per night)                          | –                                                                                                                                                      | –                 | Percent reduction | 43.2             | –                | n/a                                                                                   |
| Lindsay 1995 (wet season) | Eaves         | Open vs closed                              | Density of of adult anophelines (mean number <i>An. gambiae</i> s.l. caught under bednets)        | –                                                                                                                                                      | –                 | Percent increase  | –                | 10 (0–21)        | Store room, bednets tucked, fire, ceiling                                             |
| Russell 2013              | Eaves         | Closed vs open                              | Density of aduly <i>An. gambiae</i> s.l. (CDC light trap))                                        | 31.25% households in low anopheline density cluster (Z scores <1.96) had closed eaves vs 0% houses in high anopheline density cluster (Z scores >1.96) |                   |                   |                  |                  |                                                                                       |
| Wanzirah 2015             | Eaves         | Closed vs open                              | Human biting rate (mean number of <i>Anopheles</i> per CDC light trap per night)                  | –                                                                                                                                                      | –                 | IRR               | –                | 0.58 (0.45–0.74) | Study site, household wealth                                                          |
| Adiamah 1993              | Ceiling       | No ceiling vs ceiling                       | Density of adult Anophelines (geometric mean number adult <i>Anopheles</i> per light trap catch)  | 20.5                                                                                                                                                   | 10.7              | None reported     | –                | –                | n/a                                                                                   |
| Lindsay 1995 (wet season) | Ceiling       | Ceiling present vs absent                   | Density of of adult anophelines (mean number <i>An. gambiae</i> s.l. caught under bednets)        | –                                                                                                                                                      | –                 | Percent decrease  | –                | 13 (1–25)        | Store room, bednets tucked, fire, open eaves                                          |
| Burkot 1989               | Elevation     | Houses built on stilts vs at ground level   | Human biting rate (mean number of <i>Anopheles</i> per human landing catch)                       | 50.8 (SD 46.9)                                                                                                                                         | 166 (SD 125)      | None reported     | –                | –                | –                                                                                     |
| Charlwood 2003            | Elevation     | Ground level homes vs homes built on stilts | Human biting rate (mean number of <i>Anopheles</i> per man hour of collection (HLC))              | 3.58 (2.9–4.4)                                                                                                                                         | 2.38 (1.7–3.3)    | Abundance Ratio   | 1.5 (1.0–2.2)    | –                | n/a                                                                                   |
| Charlwood 2003            | Elevation     | Ground level homes vs homes built on stilts | Human biting rate (mean number of <i>An. gambiae</i> per light trap per night)                    | –                                                                                                                                                      | –                 | None reported     | –                | –                | n/a                                                                                   |
| Hiscox 2013               | Elevation     | Continuous variable (height on stilts)      | Human biting rate (mean number of <i>Anopheles</i> per CDC light trap per night)                  | –                                                                                                                                                      | –                 | IRR               | 1.00 (0.99–1.00) | –                | n/a                                                                                   |
| Animut 2013               | Windows       | Present vs absent                           | Density of <i>An. arabiensis</i> (mean number <i>An. arabiensis</i> per CDC light trap per house) | 0.27 (–0.04–0.60)                                                                                                                                      | 1.02 (0.78–1.27)  | Abundance Ratio   | 0.3 (0.1–0.9)    | –                | n/a                                                                                   |

Tusting LS, Ippolito M, et al. The evidence for improving housing to reduce malaria: a systematic review and meta-analysis.

b. Observational studies (continued)

| Reference   | House feature     | Specific comparison                           | Outcome                                                                                           | Mean density or rate |                   | Measure of effect | Crude results    | Adjusted results | Factors adjusted for                                             |
|-------------|-------------------|-----------------------------------------------|---------------------------------------------------------------------------------------------------|----------------------|-------------------|-------------------|------------------|------------------|------------------------------------------------------------------|
|             |                   |                                               |                                                                                                   | Exposed              | Unexposed         |                   |                  |                  |                                                                  |
| Animut 2013 | Windows           | Present vs absent                             | Density of <i>An. arabiensis</i> (mean number <i>An. arabiensis</i> per pyrethrum spray catch)    | 1.95 (0.72–3.18)     | 2.35 (1.30–3.39)  | Abundance Ratio   | 0.8 (0.4-1.8)    | –                | n/a                                                              |
| Hiscox 2013 | Doors and windows | Other covering vs resettlement style shutters | Human biting rate (mean number of <i>Anopheles</i> per CDC light trap per night)                  | –                    | –                 | IRR               | 1.23 (0.75–2.01) | –                | n/a                                                              |
| Hiscox 2013 | Doors and windows | Open vs resettlement style covers             | Human biting rate (mean number of <i>Anopheles</i> per CDC light trap per night)                  | –                    | –                 | IRR               | 0.87 (0.25–3.12) | –                | n/a                                                              |
| Animut 2013 | Roof condition    | Hole present vs absent                        | Density of <i>An. arabiensis</i> (mean number <i>An. arabiensis</i> per pyrethrum spray catch)    | 4.81 (3.31–6.31)     | 1.17 (0.24–2.10)  | Abundance Ratio   | 4.1 (1.8-9.5)    | –                | n/a                                                              |
| Animut 2013 | Roof condition    | Hole present vs absent                        | Density of <i>An. arabiensis</i> (mean number <i>An. arabiensis</i> per CDC light trap per house) | 1.12 (0.75–1.50)     | 0.61 (0.38–0.83)  | Abundance Ratio   | 1.8 (1.1-3.0)    | –                | n/a                                                              |
| Animut 2013 | Wall condition    | Hole present vs absent                        | Density of <i>An. arabiensis</i> (mean number <i>An. arabiensis</i> per CDC light trap per house) | 0.77 (0.54–1.01)     | 0.67 (0.32–1.02)  | Abundance Ratio   | 1.1 (0.6-2.1)    | –                | n/a                                                              |
| Animut 2013 | Wall condition    | Hole present vs absent                        | Density of <i>An. arabiensis</i> (mean number <i>An. arabiensis</i> per pyrethrum spray catch)    | 3.27 (2.22–4.32)     | 0.73 (–0.48–1.94) | Abundance Ratio   | 4.5 (0.9-23.4)   | –                | n/a                                                              |
| Hiscox 2013 | Veranda style     | Closed vs open                                | Human biting rate (mean number of <i>Anopheles</i> per CDC light trap per night)                  | –                    | –                 | IRR               | 0.32 (0.18–0.58) | 0.51 (0.23–1.11) | Village, location of kitchen, wall material, presence of animals |

CDC: Centers for Disease Control and Prevention; OR: Odds Ratio; IRR: Incidence Rate Ratio; SES: socioeconomic status
